# Supplementary material
Source: PubMed Central journal article supplement (PMC6390816)
Supplement: MD-010-C8MD00540K-s001.pdf [file MD-010-C8MD00540K-s001.pdf]

## Electronic supplementary information (ESI)

### 4-methoxy-2,3-dihydro-1H-inden-1-one (2a):

### Nuclear magnetic resonance (NMR) spectra

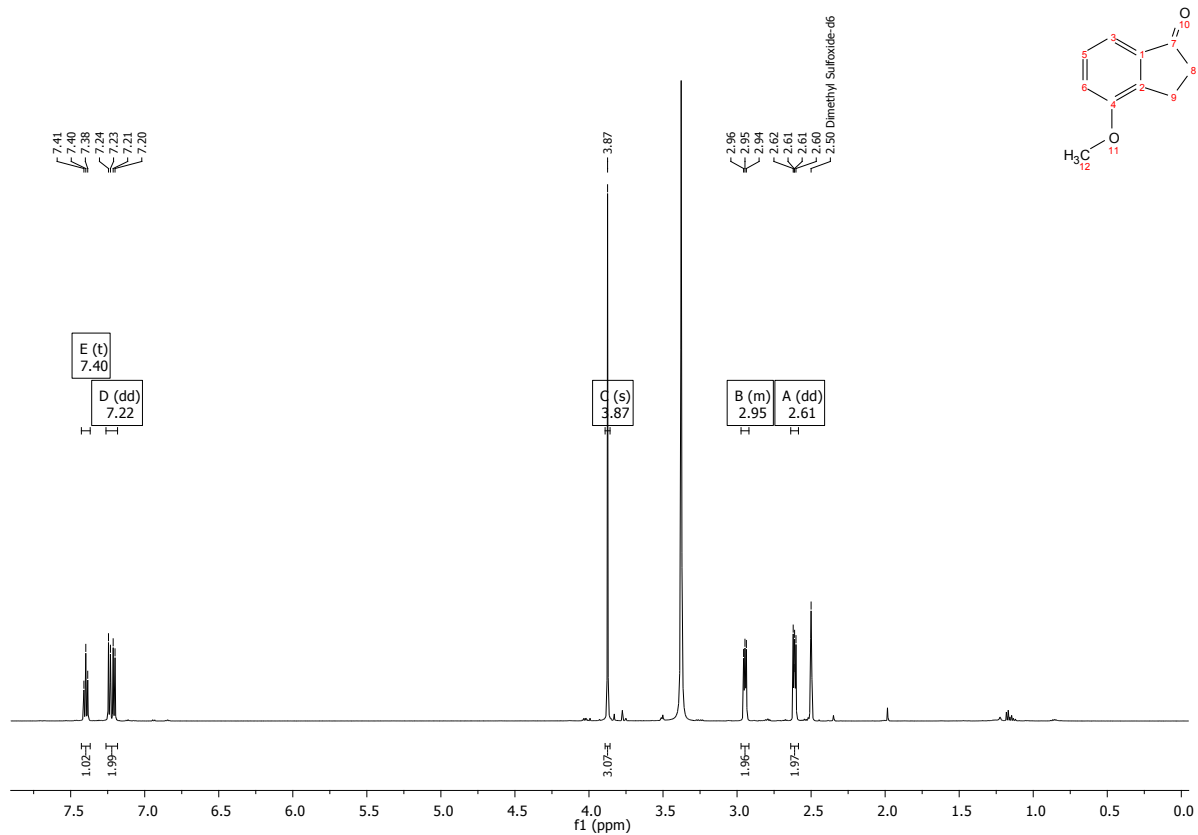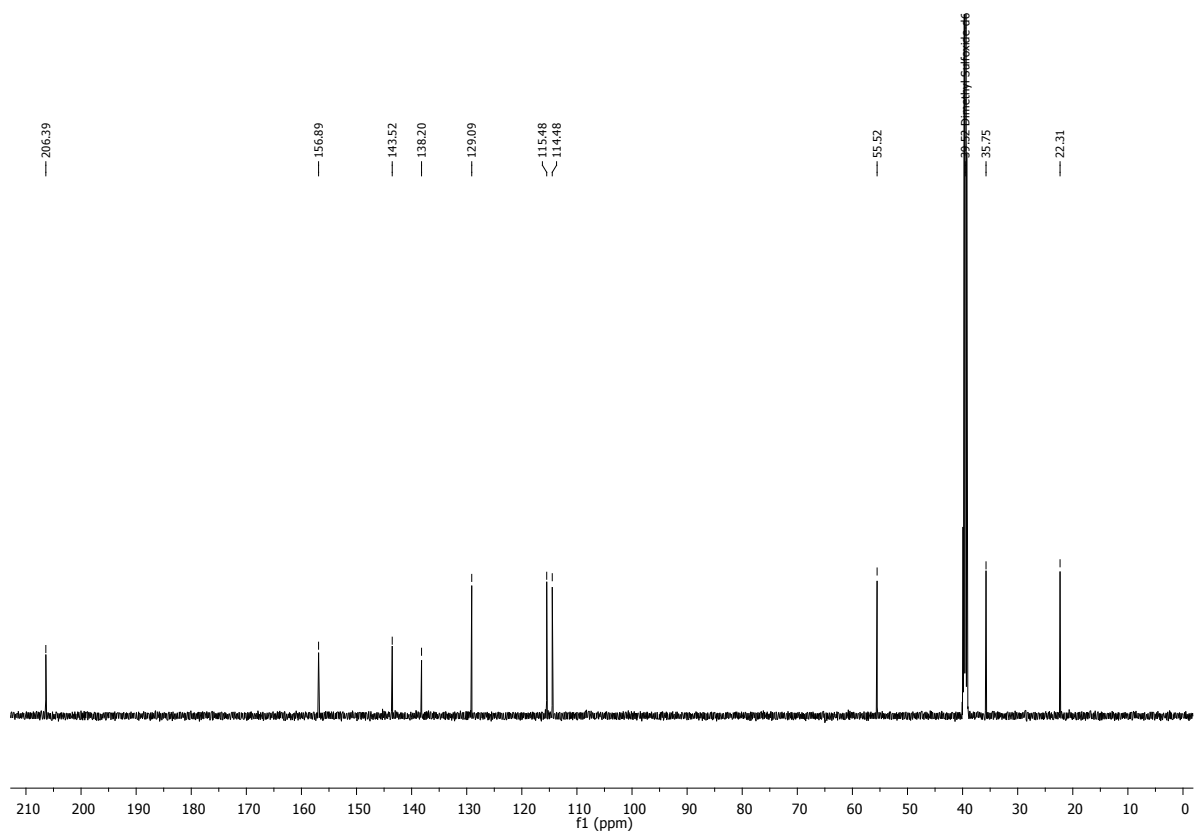

## Mass spectra (MS)

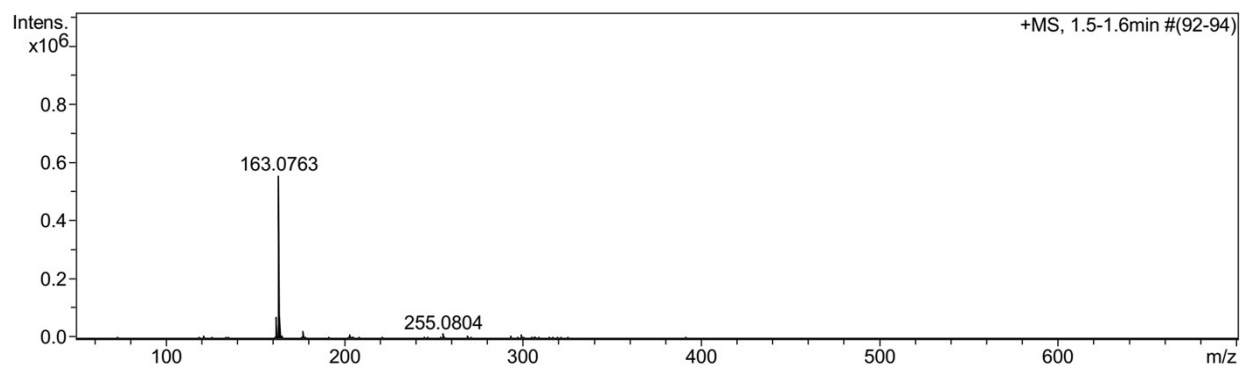

| Meas. m/z | # | Formula       | Score  | m/z      | err [mDa] | err [ppm] | mSigma | rdb | N-Rule | e <sup>-</sup> Conf |
|-----------|---|---------------|--------|----------|-----------|-----------|--------|-----|--------|---------------------|
| 163.0763  | 1 | C 10 H 11 O 2 | 100.00 | 163.0754 | -1.0      | -6.0      | 11.6   | 5.5 | ok     | even                |
|           | 2 | C 8 H 9 N 3 O | 34.06  | 163.0740 | -2.3      | -14.2     | 18.8   | 6.0 | ok     | odd                 |
|           | 3 | C 6 H 7 N 6   | 8.18   | 163.0727 | -3.7      | -22.5     | 24.6   | 6.5 | ok     | even                |

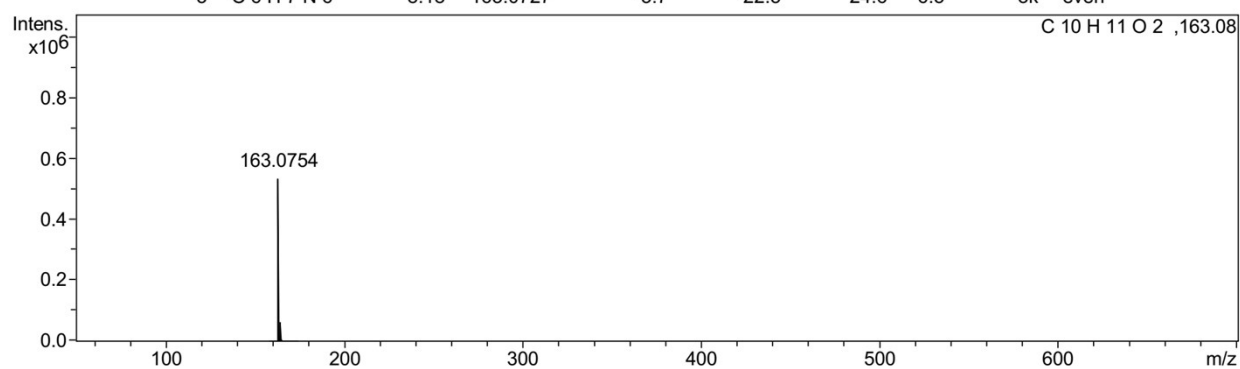

| Meas. m/z | # | Formula | Score | m/z | err [mDa] | err [ppm] | mSigma | rdb | N-Rule | e <sup>-</sup> Conf |
|-----------|---|---------|-------|-----|-----------|-----------|--------|-----|--------|---------------------|
|-----------|---|---------|-------|-----|-----------|-----------|--------|-----|--------|---------------------|

# High-performance liquid chromatography (HPLC) chromatogram

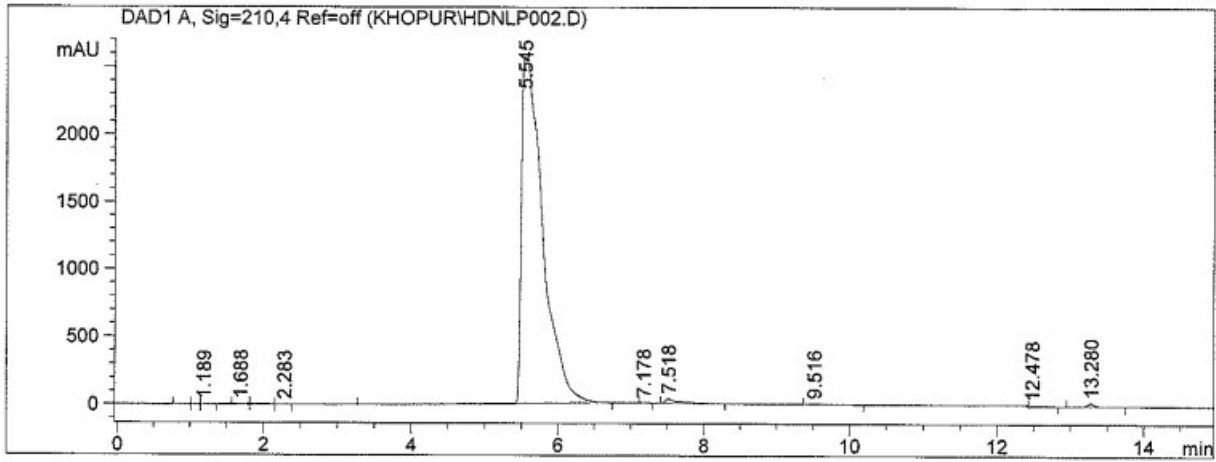

## Area Percent Report

Sorted By : Signal  
 Calib. Data Modified : 2013/05/28 11:12:51 AM  
 Multiplier : 1.0000  
 Dilution : 1.0000  
 Use Multiplier & Dilution Factor with ISTDs

Signal 1: DAD1 A, Sig=210,4 Ref=off

| Peak # | RetTime [min] | Type | Width [min] | Area [mAU*s] | Area %  | Name |
|--------|---------------|------|-------------|--------------|---------|------|
| 1      | 0.964         | VV   | 0.1659      | 15.82110     | 0.0304  | ?    |
| 2      | 1.051         | VV   | 0.1018      | 10.15845     | 0.0195  | ?    |
| 3      | 1.189         | VB   | 0.1454      | 16.22145     | 0.0312  | ?    |
| 4      | 1.688         | BB   | 0.0777      | 9.63380      | 0.0185  | ?    |
| 5      | 1.919         | BB   | 0.2673      | 32.87612     | 0.0632  | ?    |
| 6      | 2.283         | BB   | 0.1193      | 13.34806     | 0.0257  | ?    |
| 7      | 2.887         |      | 0.0000      | 0.00000      | 0.0000  | sulf |
| 8      | 5.220         |      | 0.0000      | 0.00000      | 0.0000  | pir  |
| 9      | 5.545         | BB   | 0.2735      | 5.12667e4    | 98.6314 | ?    |
| 10     | 7.178         | BB   | 0.0787      | 5.51010      | 0.0106  | ?    |
| 11     | 7.518         | BB   | 0.1667      | 383.94351    | 0.7387  | ?    |
| 12     | 9.516         | BBA  | 0.2102      | 40.98358     | 0.0788  | ?    |
| 13     | 12.478        | PB   | 0.1071      | 36.28995     | 0.0698  | ?    |
| 14     | 13.280        | BB   | 0.0937      | 146.60283    | 0.2820  | ?    |

Totals : 5.19781e4

# (E)-2-benzylidene-4-methoxy-2,3-dihydro-1H-inden-1-one (2b):

## NMR spectra

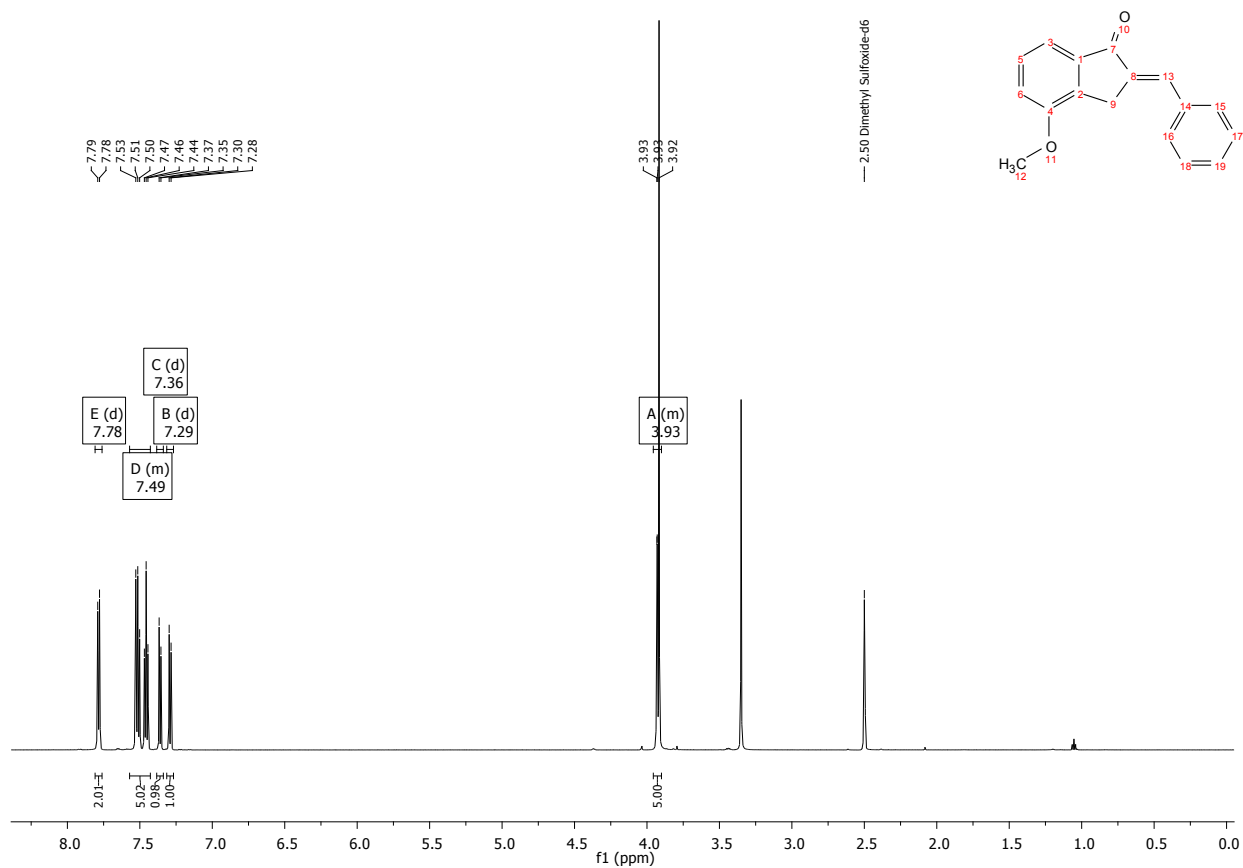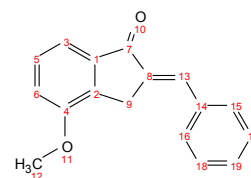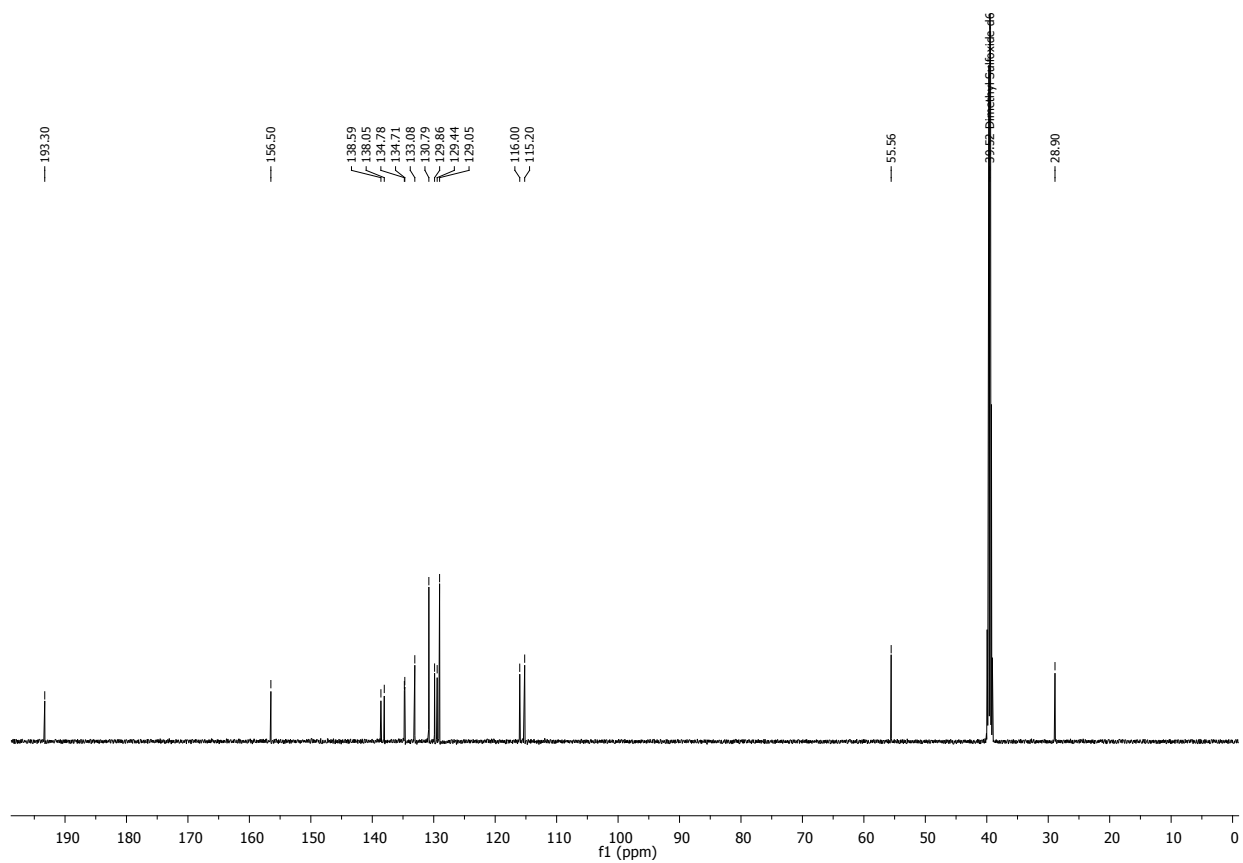

# MS

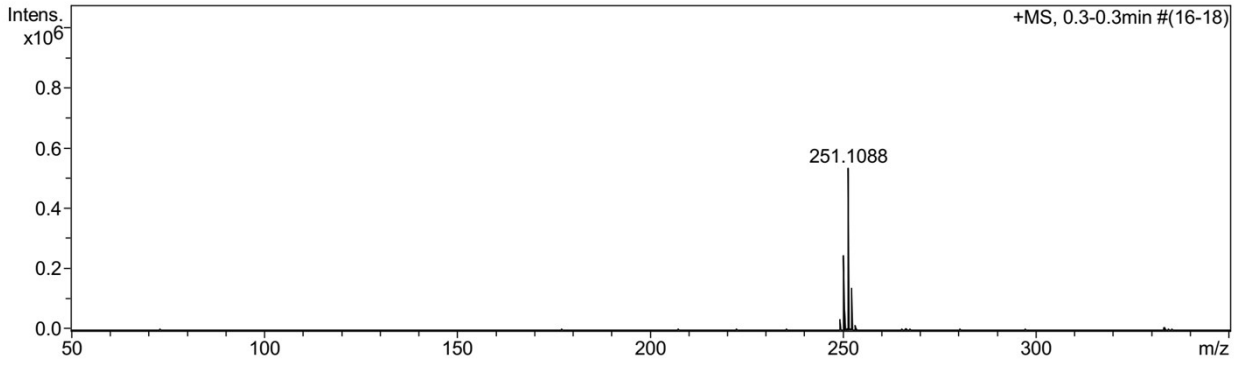

| Meas. m/z | # | Formula                                        | Score  | m/z      | err [mDa] | err [ppm] | mSigma | rdb  | N-Rule | e <sup>-</sup> Conf |
|-----------|---|------------------------------------------------|--------|----------|-----------|-----------|--------|------|--------|---------------------|
| 251.1088  | 1 | C <sub>17</sub> H <sub>15</sub> O <sub>2</sub> | 100.00 | 251.1067 | -2.2      | -8.6      | 44.1   | 10.5 | ok     | even                |
|           | 2 | C <sub>10</sub> H <sub>19</sub> O <sub>7</sub> | 4.75   | 251.1125 | 3.7       | 14.8      | 87.7   | 1.5  | ok     | even                |

# HPLC chromatogram

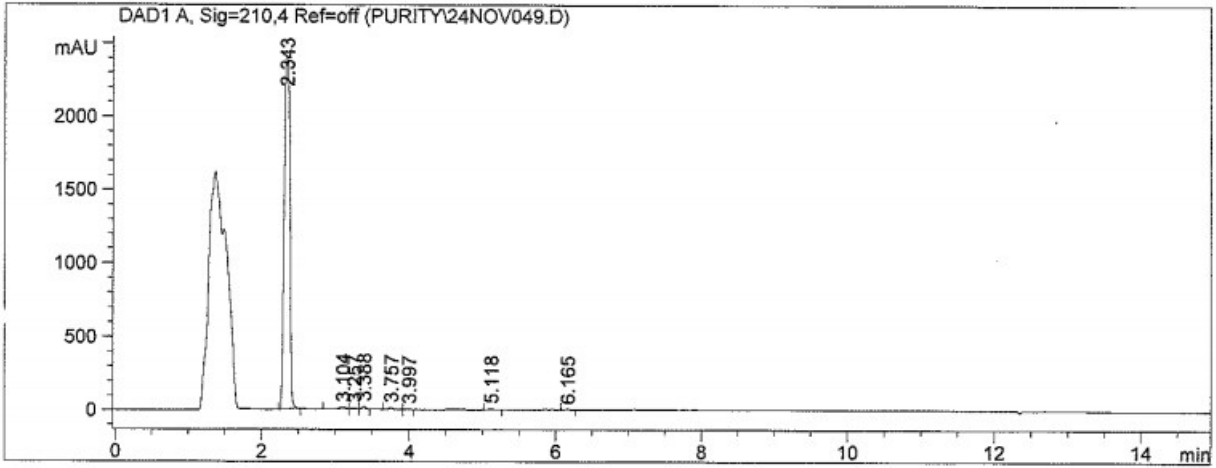

## Area Percent Report

Sorted By : Signal  
Multiplier : 1.0000  
Dilution : 1.0000  
Use Multiplier & Dilution Factor with ISTDs

Signal 1: DAD1 A, Sig=210,4 Ref=off

| Peak # | RetTime [min] | Type | Width [min] | Area [mAU*s] | Height [mAU] | Area %  |
|--------|---------------|------|-------------|--------------|--------------|---------|
| 1      | 2.343         | PBA  | 0.0881      | 1.28312e4    | 2411.35864   | 98.0813 |
| 2      | 3.104         | PB   | 0.0809      | 64.26879     | 12.30296     | 0.4913  |
| 3      | 3.257         | BB   | 0.0587      | 21.91106     | 5.98245      | 0.1675  |
| 4      | 3.388         | BB   | 0.0534      | 56.22673     | 16.63841     | 0.4298  |
| 5      | 3.757         | BB   | 0.0697      | 56.11786     | 12.20233     | 0.4290  |
| 6      | 3.997         | BB   | 0.0561      | 13.94288     | 4.05715      | 0.1066  |
| 7      | 5.118         | PBA  | 0.0647      | 25.13927     | 6.02553      | 0.1922  |
| 8      | 6.165         | BBA  | 0.0607      | 13.40537     | 3.50096      | 0.1025  |

Totals : 1.30822e4 2472.06844

# (E)-2-(3-hydroxybenzylidene)-4-methoxy-2,3-dihydro-1H-inden-1-one (2c)

## NMR spectra

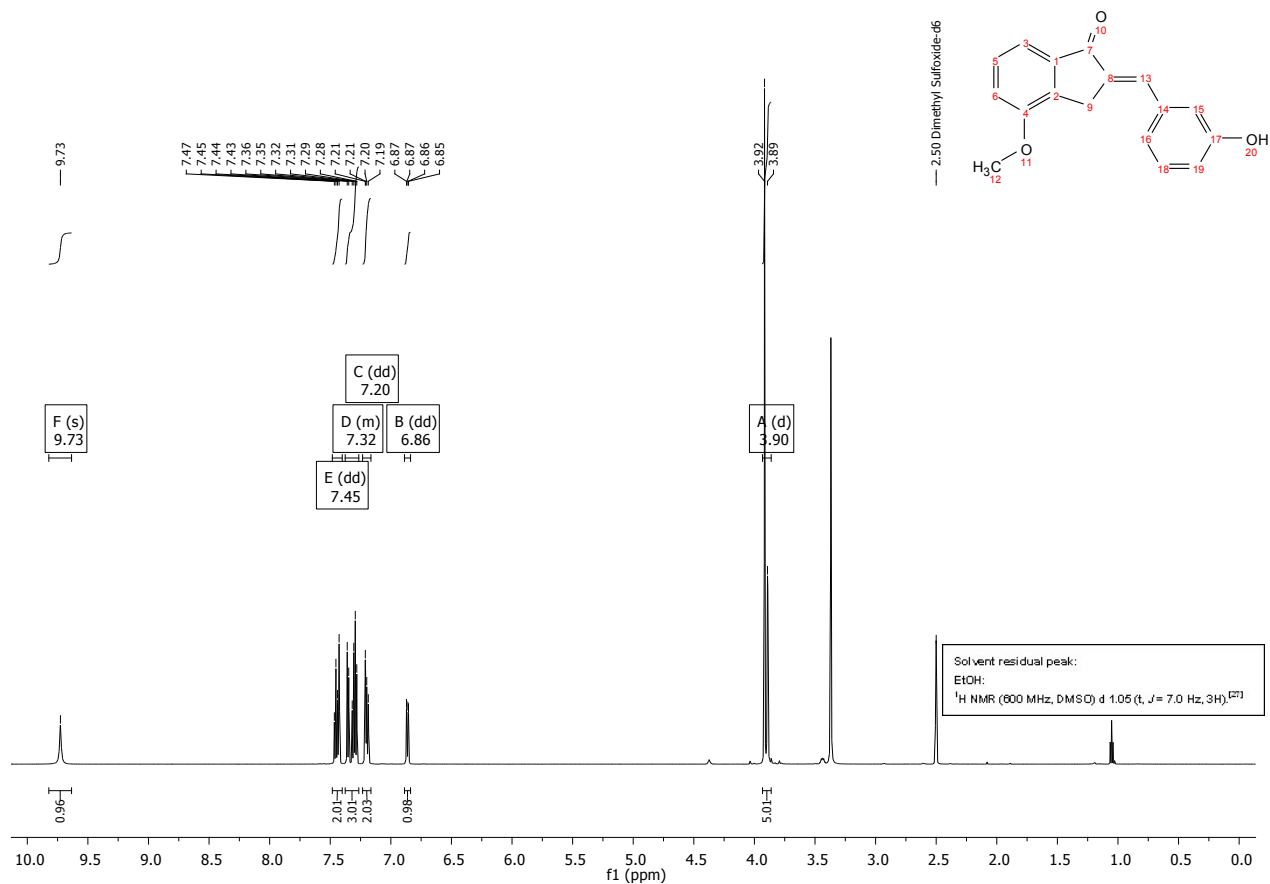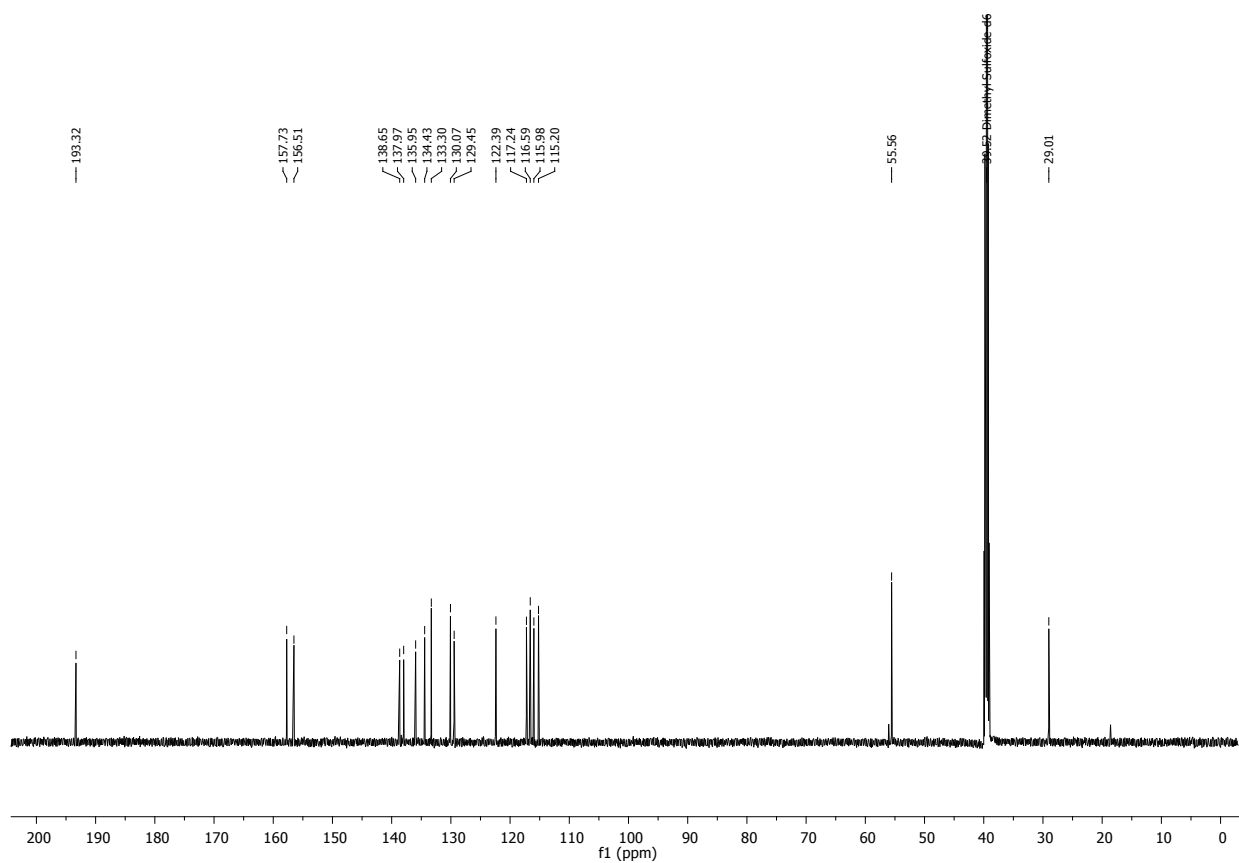

# MS

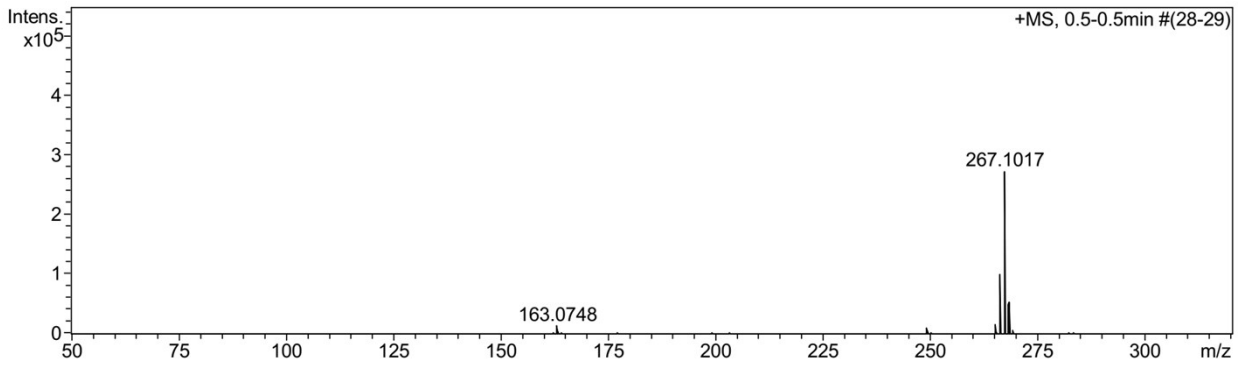

| Meas. m/z | # | Formula                                        | Score  | m/z      | err [mDa] | err [ppm] | mSigma | rdb  | N-Rule | e <sup>-</sup> Conf |
|-----------|---|------------------------------------------------|--------|----------|-----------|-----------|--------|------|--------|---------------------|
| 267.1017  | 1 | C <sub>17</sub> H <sub>15</sub> O <sub>3</sub> | 100.00 | 267.1016 | -0.1      | -0.5      | 5.1    | 10.5 | ok     | even                |



# HPLC chromatogram

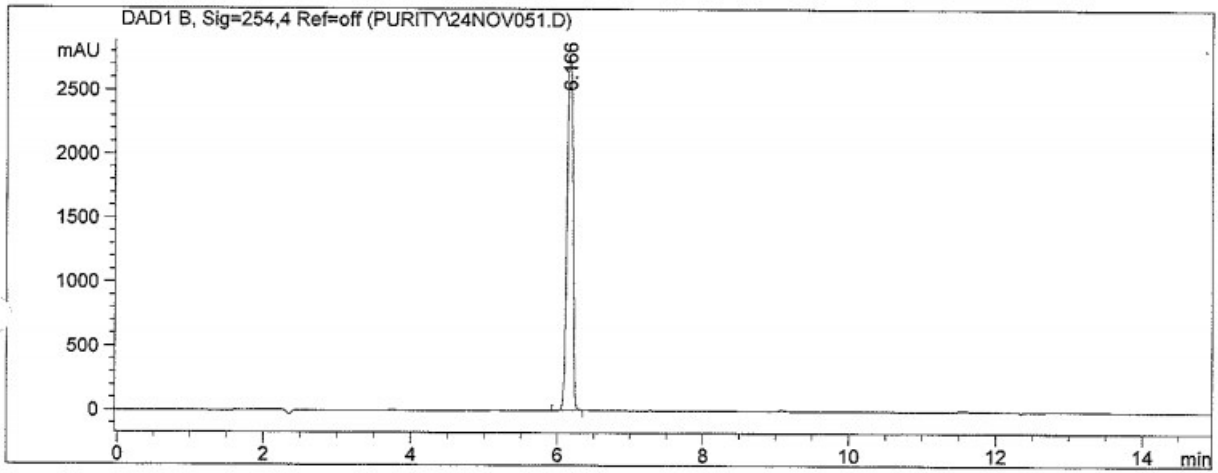

=====  
Area Percent Report  
=====

Sorted By : Signal  
Multiplier : 1.0000  
Dilution : 1.0000  
Use Multiplier & Dilution Factor with ISTDs

Signal 1: DAD1 B, Sig=254,4 Ref=off

| Peak # | RetTime [min] | Type | Width [min] | Area [mAU*s] | Height [mAU] | Area %   |
|--------|---------------|------|-------------|--------------|--------------|----------|
| 1      | 6.166         | PB   | 0.0941      | 1.55369e4    | 2742.97998   | 100.0000 |

Totals : 1.55369e4 2742.97998

# (E)-2-(4-hydroxybenzylidene)-4-methoxy-2,3-dihydro-1H-inden-1-one (2d)

## NMR spectra

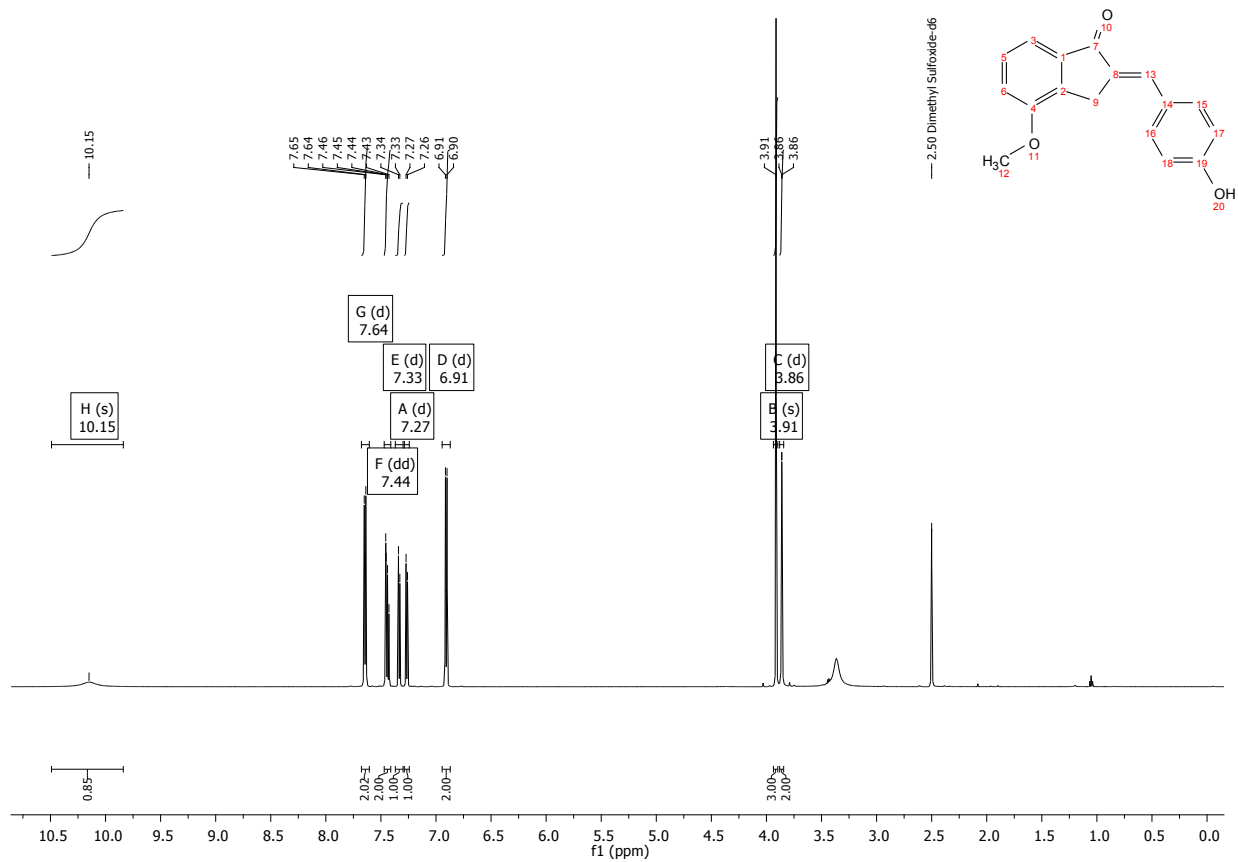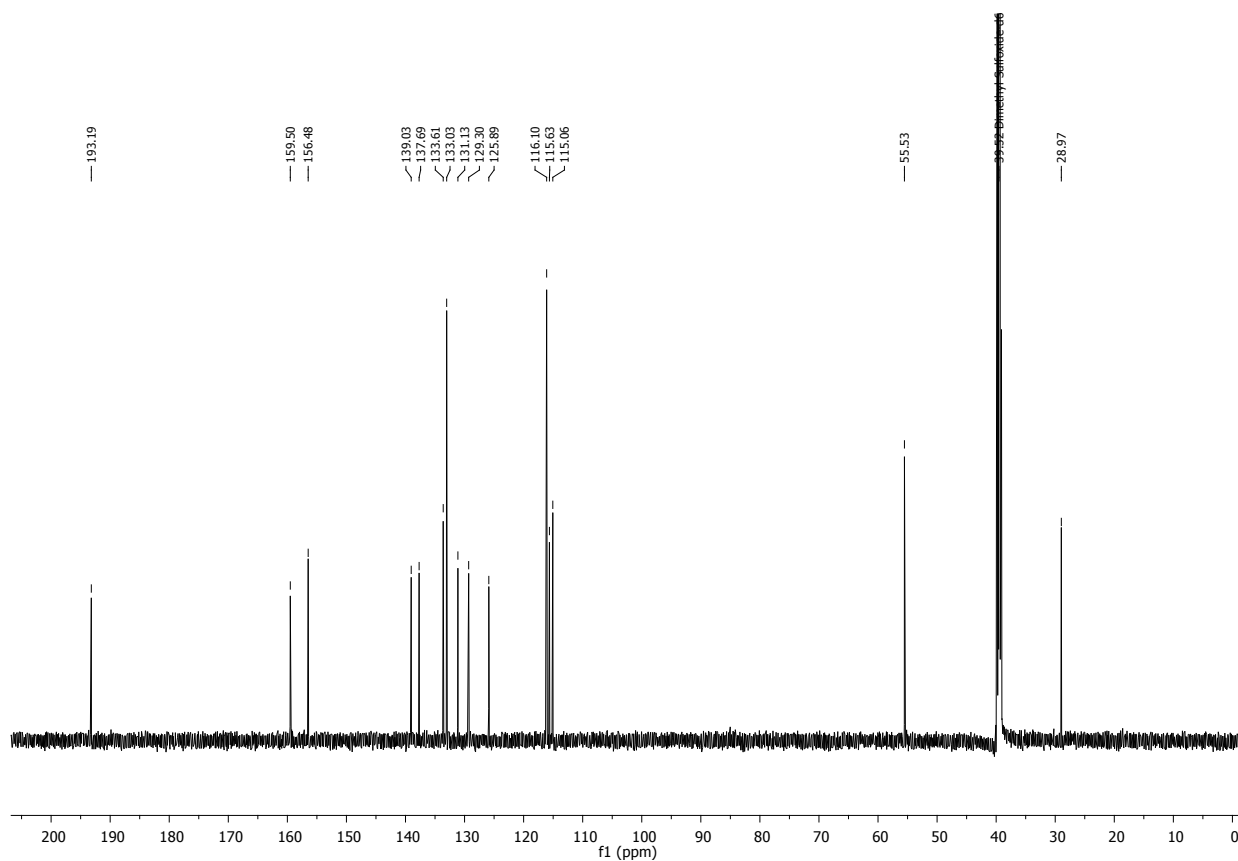

# MS

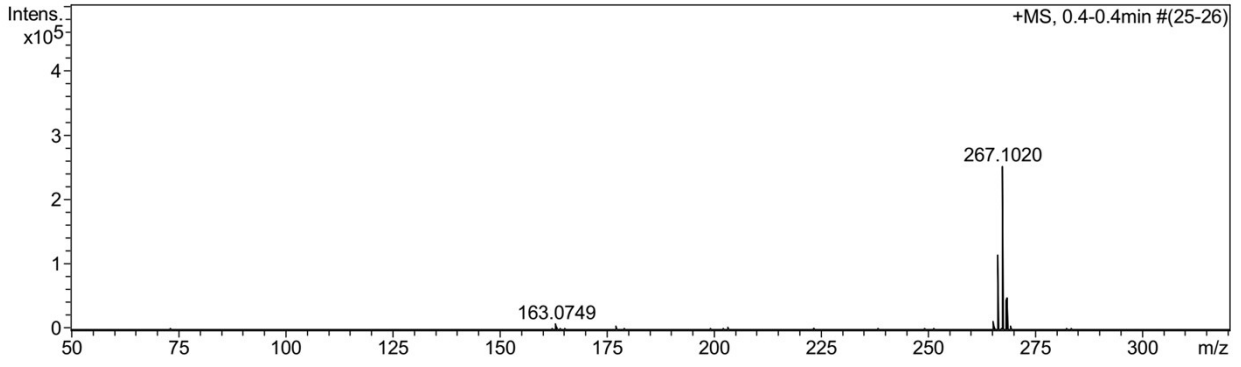

| Meas. m/z | # | Formula                                        | Score  | m/z      | err [mDa] | err [ppm] | mSigma | rdb  | N-Rule | e <sup>-</sup> Conf |
|-----------|---|------------------------------------------------|--------|----------|-----------|-----------|--------|------|--------|---------------------|
| 267.1020  | 1 | C <sub>17</sub> H <sub>15</sub> O <sub>3</sub> | 100.00 | 267.1016 | -0.4      | -1.5      | 4.9    | 10.5 | ok     | even                |

# HPLC chromatogram

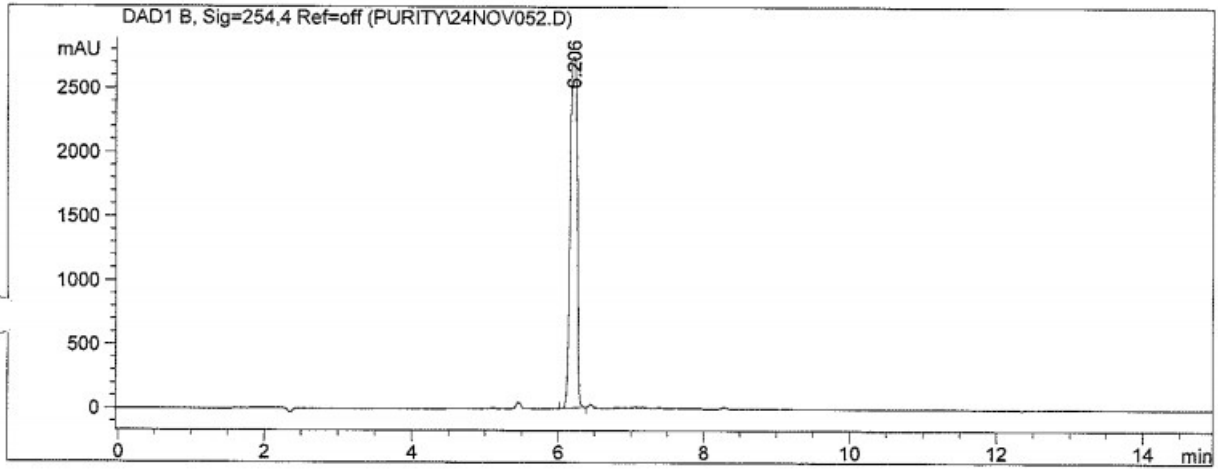

## Area Percent Report

Sorted By : Signal  
Multiplier : 1.0000  
Dilution : 1.0000  
Use Multiplier & Dilution Factor with ISTDs

Signal 1: DAD1 B, Sig=254,4 Ref=off

| Peak # | RetTime [min] | Type | Width [min] | Area [mAU*s] | Height [mAU] | Area %   |
|--------|---------------|------|-------------|--------------|--------------|----------|
| 1      | 6.206         | BB   | 0.1092      | 1.81342e4    | 2740.04321   | 100.0000 |

Totals : 1.81342e4 2740.04321

# (E)-2-(3,4-dihydroxybenzylidene)-4-methoxy-2,3-dihydro-1H-inden-1-one (2e)

## NMR spectra

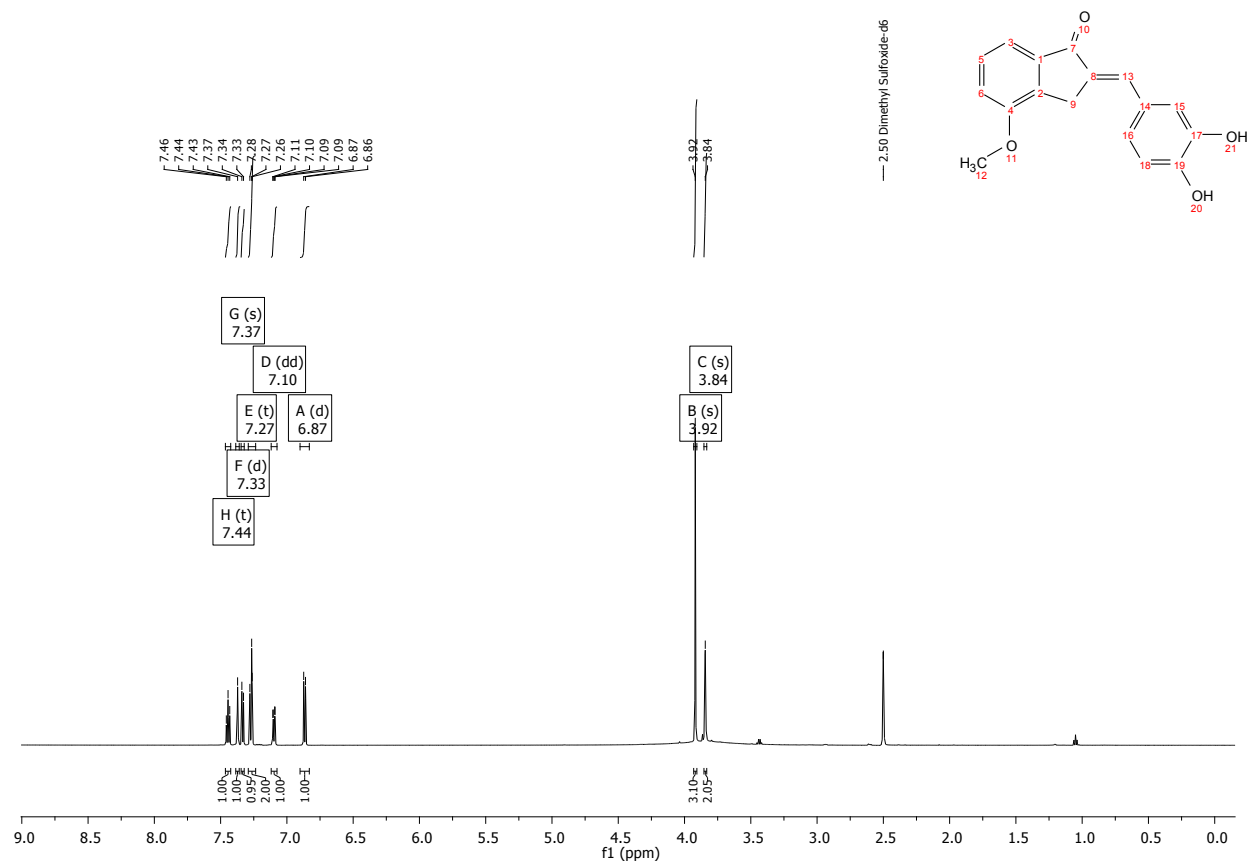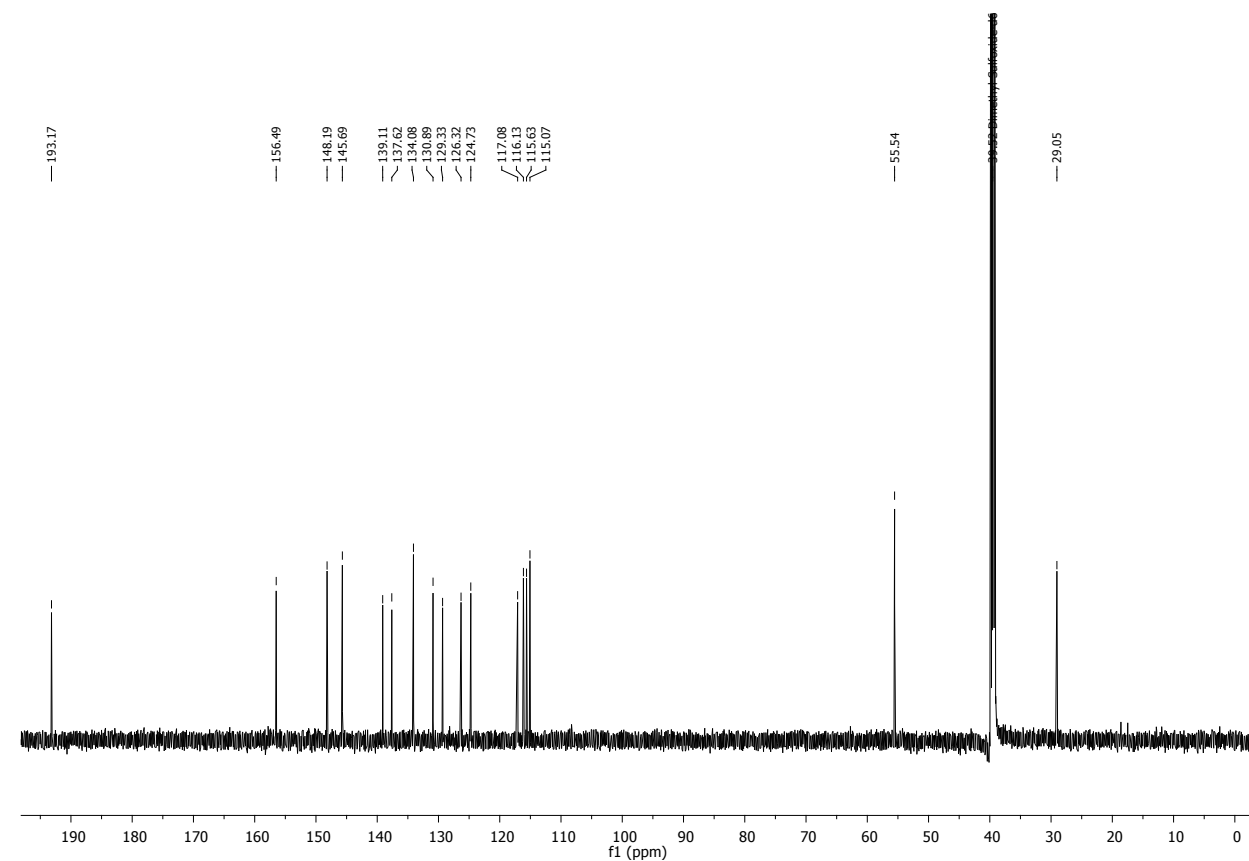

# MS

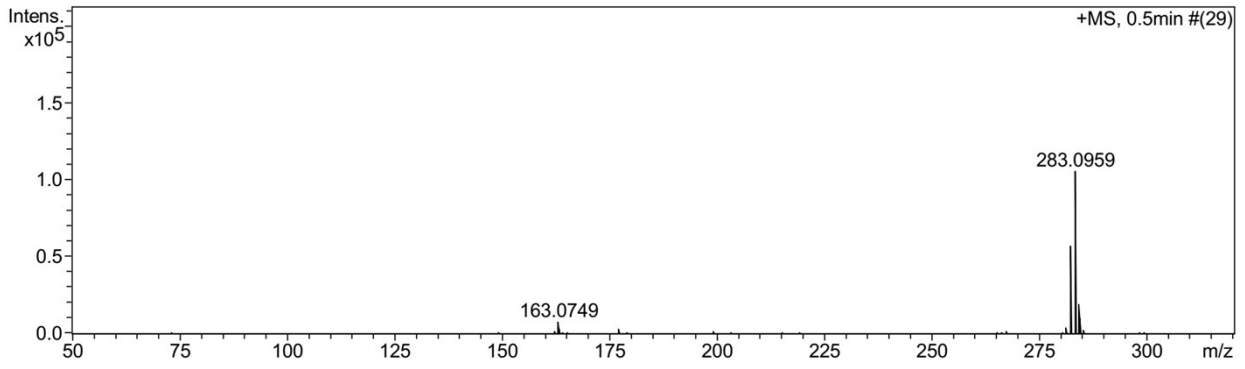

| Meas. m/z | # | Formula                                        | Score  | m/z      | err [mDa] | err [ppm] | mSigma | rdb  | N-Rule | e <sup>-</sup> Conf |
|-----------|---|------------------------------------------------|--------|----------|-----------|-----------|--------|------|--------|---------------------|
| 283.0959  | 1 | C <sub>17</sub> H <sub>15</sub> O <sub>4</sub> | 100.00 | 283.0965 | 0.6       | 2.0       | 0.7    | 10.5 | ok     | even                |

# HPLC chromatogram

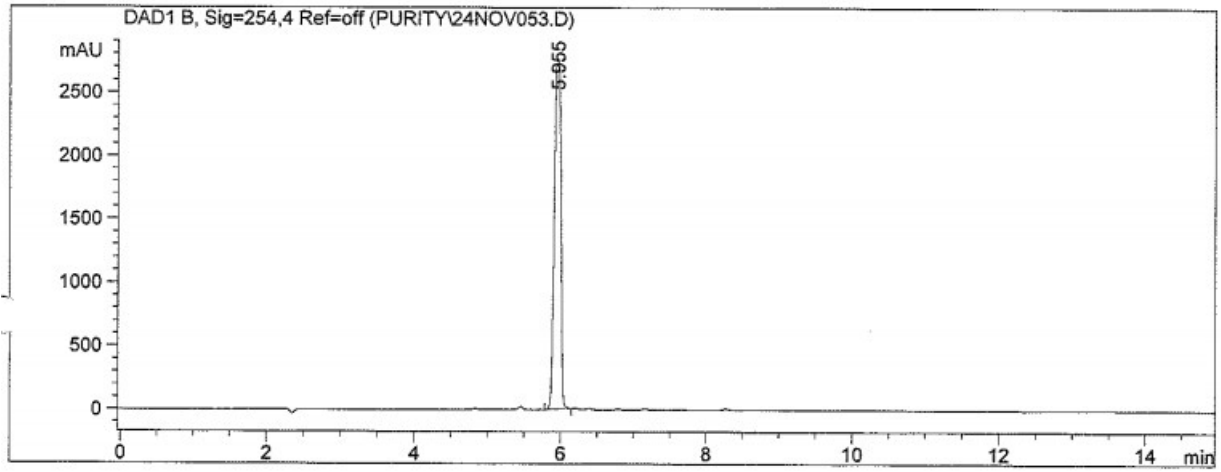

## Area Percent Report

Sorted By : Signal  
Multiplier : 1.0000  
Dilution : 1.0000  
Use Multiplier & Dilution Factor with ISTDs

Signal 1: DAD1 B, Sig=254,4 Ref=off

| Peak # | RetTime [min] | Type | Width [min] | Area [mAU*s] | Height [mAU] | Area %   |
|--------|---------------|------|-------------|--------------|--------------|----------|
| 1      | 5.955         | PB   | 0.1022      | 1.70845e4    | 2762.24927   | 100.0000 |

Totals : 1.70845e4 2762.24927

# (E)-2-(2,4,5-trimethoxybenzylidene)-4-methoxy-2,3-dihydro-1H-inden-1-one (2f)

## NMR spectra

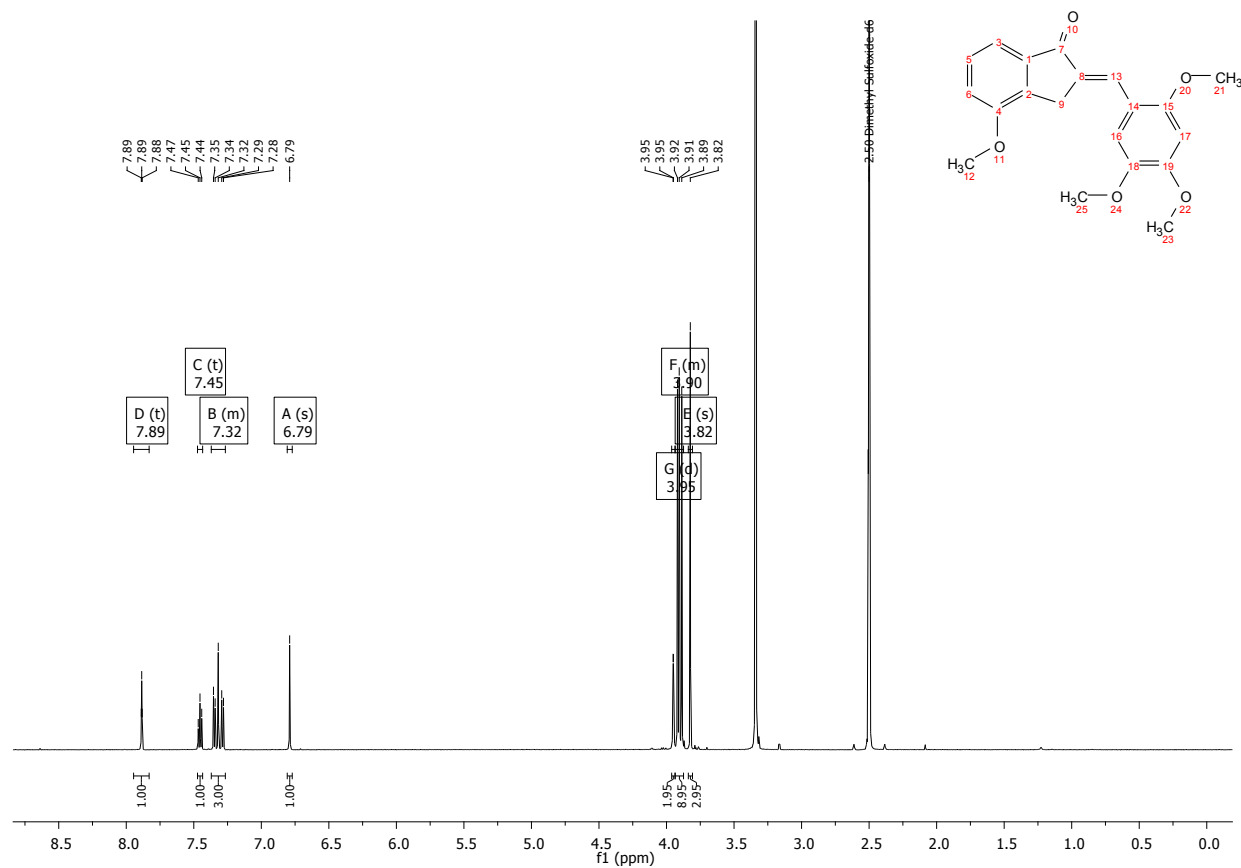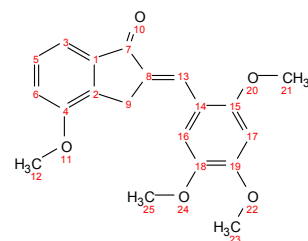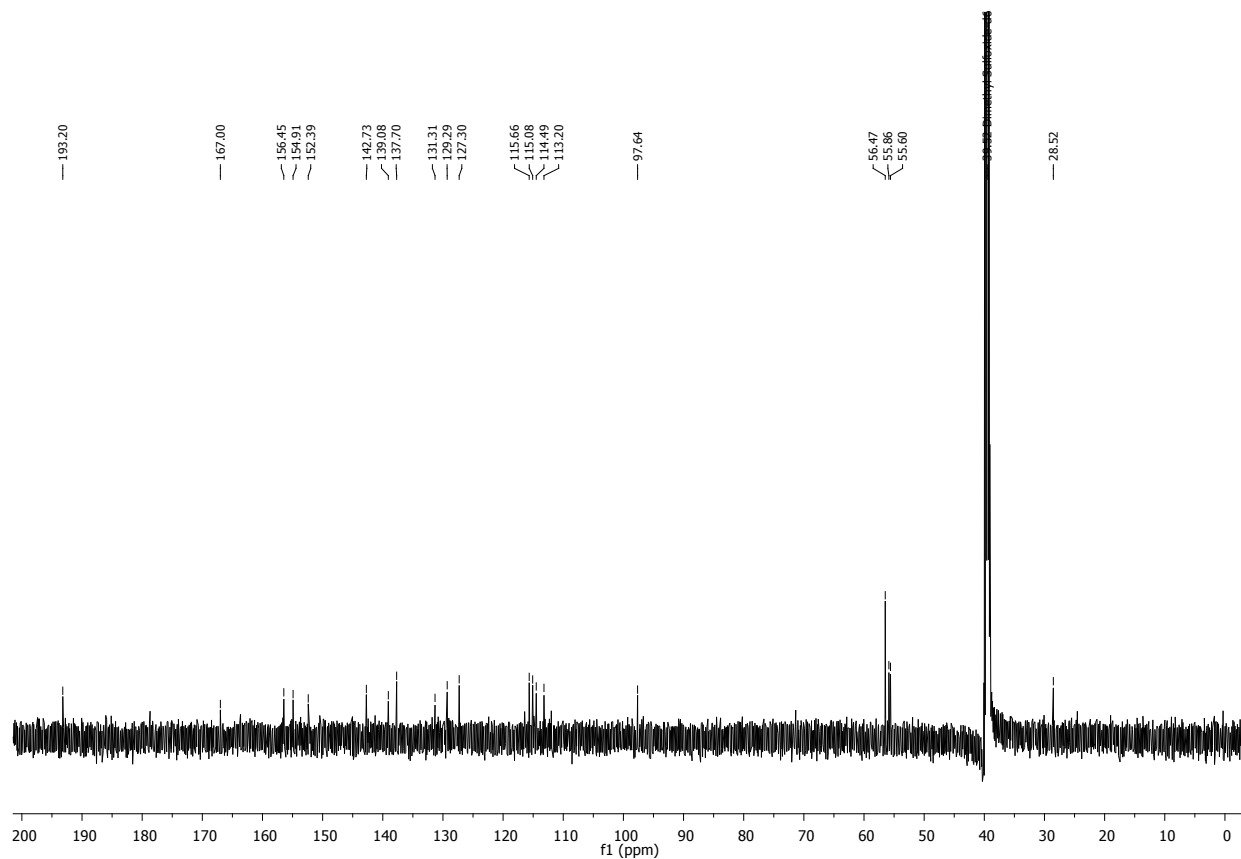



# MS

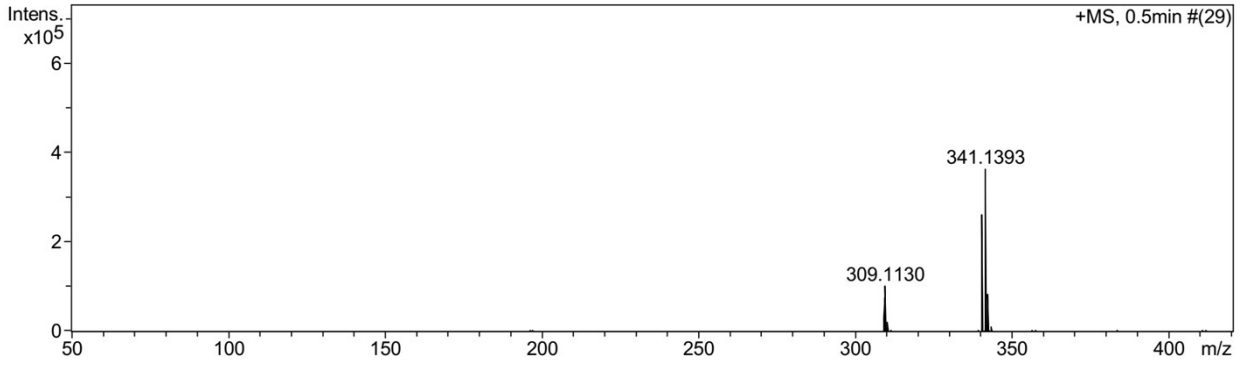

| Meas. m/z | # | Formula                                        | Score  | m/z      | err [mDa] | err [ppm] | mSigma | rdb  | N-Rule | e <sup>-</sup> Conf |
|-----------|---|------------------------------------------------|--------|----------|-----------|-----------|--------|------|--------|---------------------|
| 341.1393  | 1 | C <sub>20</sub> H <sub>21</sub> O <sub>5</sub> | 100.00 | 341.1384 | -0.9      | -2.7      | 8.4    | 10.5 | ok     | even                |
|           | 2 | C <sub>27</sub> H <sub>17</sub>                | 0.06   | 341.1325 | -6.8      | -20.0     | 30.9   | 19.5 | ok     | even                |

HPLC chromatogram

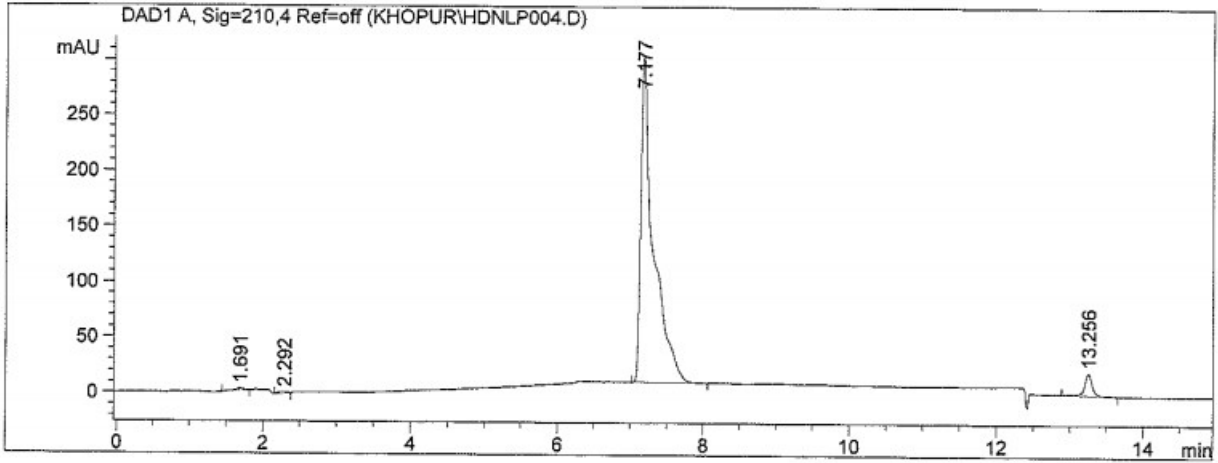

=====  
 Area Percent Report  
 =====

Sorted By : Signal  
 Calib. Data Modified : 2013/05/28 11:12:51 AM  
 Multiplier : 1.0000  
 Dilution : 1.0000  
 Use Multiplier & Dilution Factor with ISTDs

Signal 1: DAD1 A, Sig=210,4 Ref=off

| Peak # | RetTime [min] | Type | Width [min] | Area [mAU*s] | Area %  | Name |
|--------|---------------|------|-------------|--------------|---------|------|
| 1      | 1.691         | BB   | 0.1315      | 21.50692     | 0.5781  | ?    |
| 2      | 2.292         | BB   | 0.1551      | 13.59525     | 0.3654  | ?    |
| 3      | 2.887         |      | 0.0000      | 0.00000      | 0.0000  | sulf |
| 4      | 5.220         |      | 0.0000      | 0.00000      | 0.0000  | pir  |
| 5      | 7.177         | BB   | 0.1649      | 3539.46631   | 95.1349 | ?    |
| 6      | 13.256        | BBA  | 0.1086      | 145.90253    | 3.9216  | ?    |

Totals : 3720.47100

# (E)-2-(4-(dimethylamino)benzylidene)-4-methoxy-2,3-dihydro-1H-inden-1-one (2g)

## NMR spectra

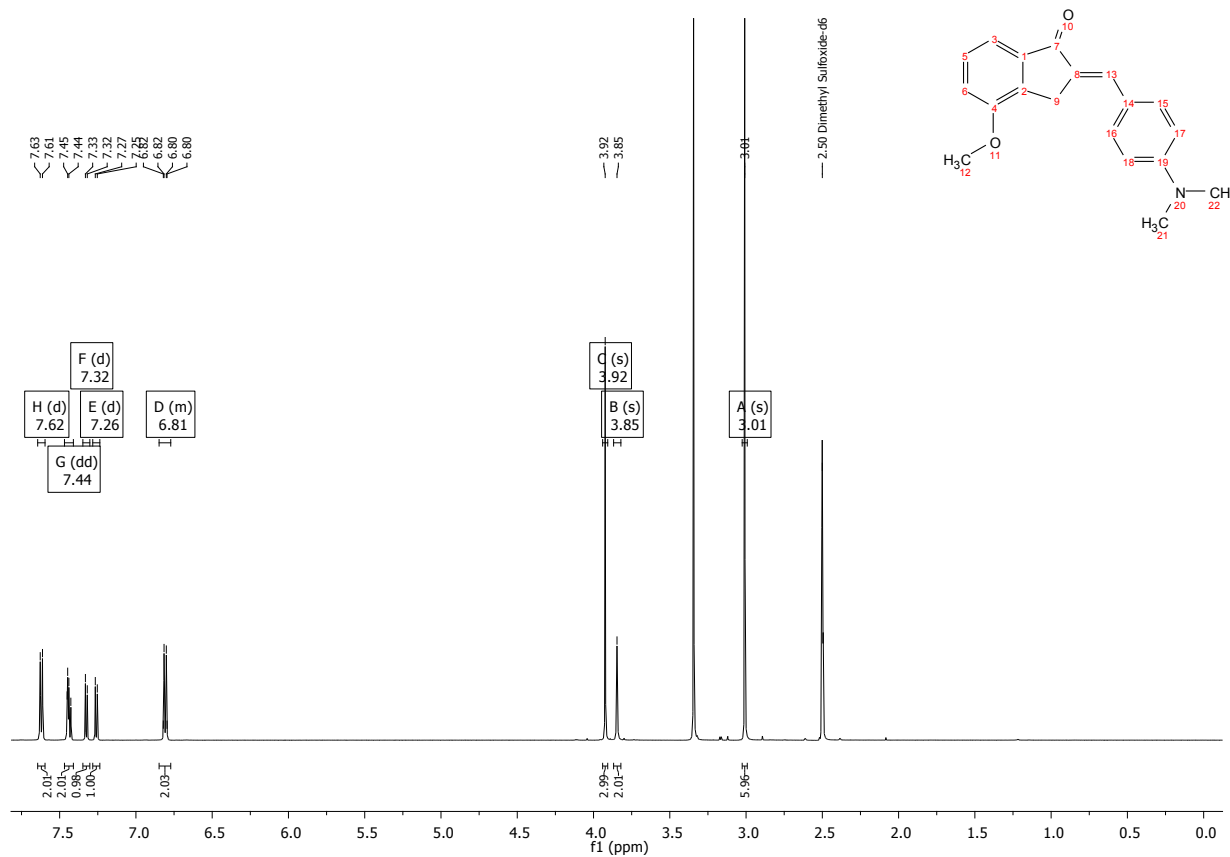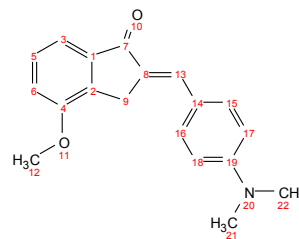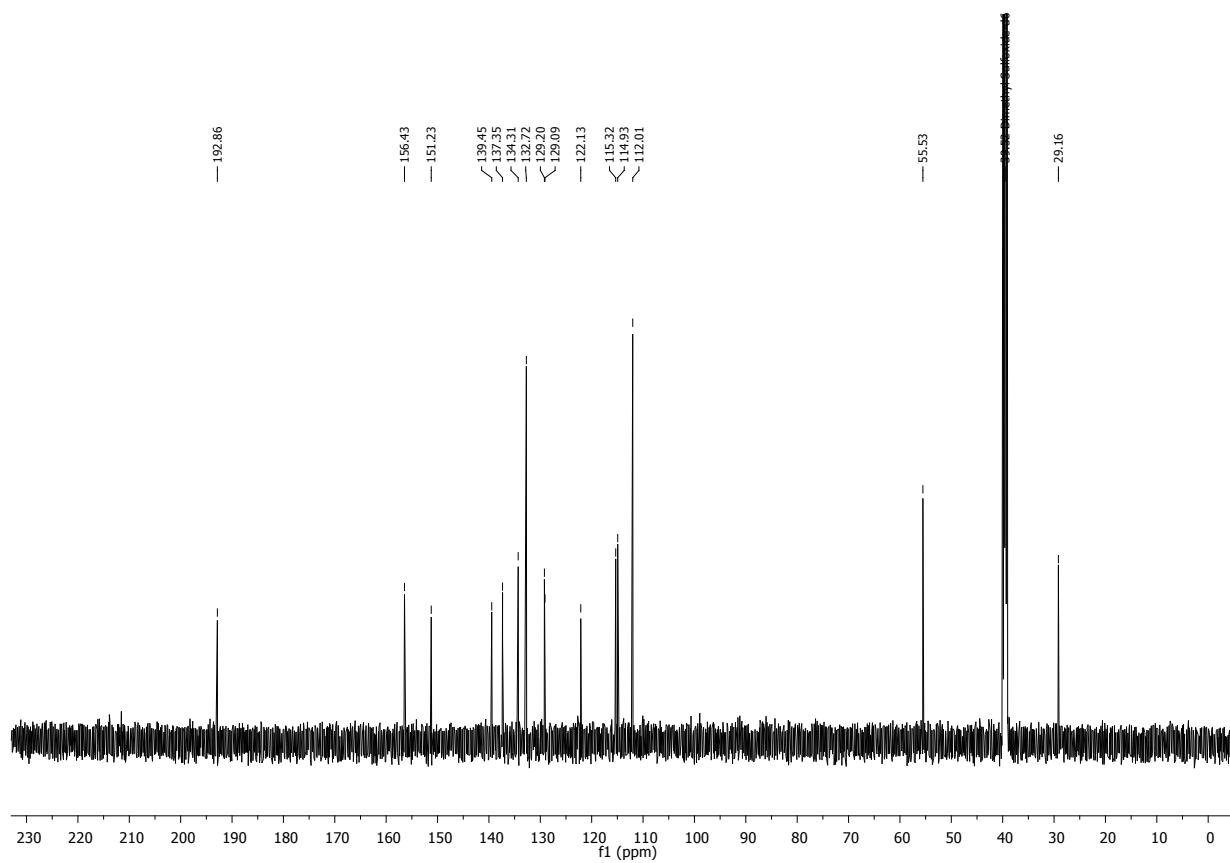

# MS

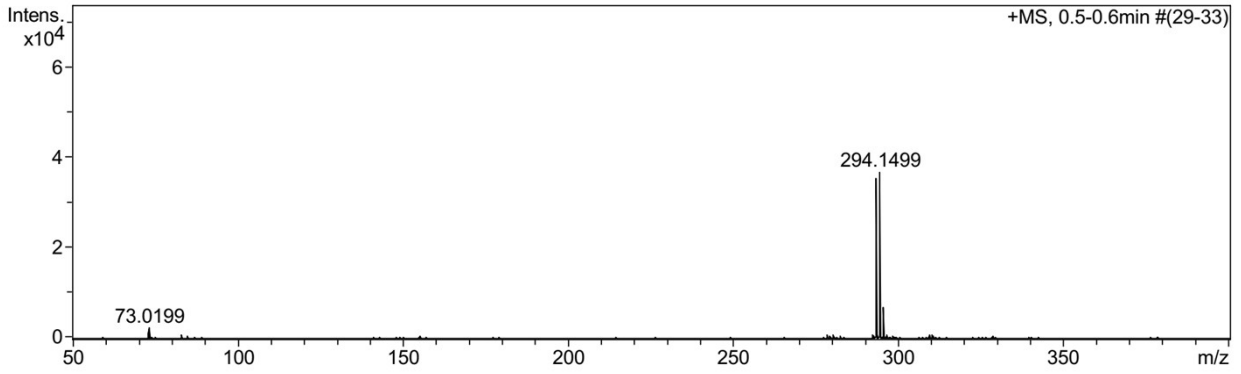

| Meas. m/z | # | Formula                                                       | Score  | m/z      | err [mDa] | err [ppm] | mSigma | rdb  | e <sup>-</sup> Conf | N-Rule |
|-----------|---|---------------------------------------------------------------|--------|----------|-----------|-----------|--------|------|---------------------|--------|
| 293.1432  | 1 | C <sub>19</sub> H <sub>19</sub> N <sub>2</sub> O <sub>2</sub> | 100.00 | 293.1410 | -2.1      | -7.3      | 466.8  | 11.0 | odd                 | ok     |
| 294.1499  | 1 | C <sub>19</sub> H <sub>20</sub> N <sub>2</sub> O <sub>2</sub> | 100.00 | 294.1489 | -1.1      | -3.6      | 12.0   | 10.5 | even                | ok     |

# HPLC chromatogram

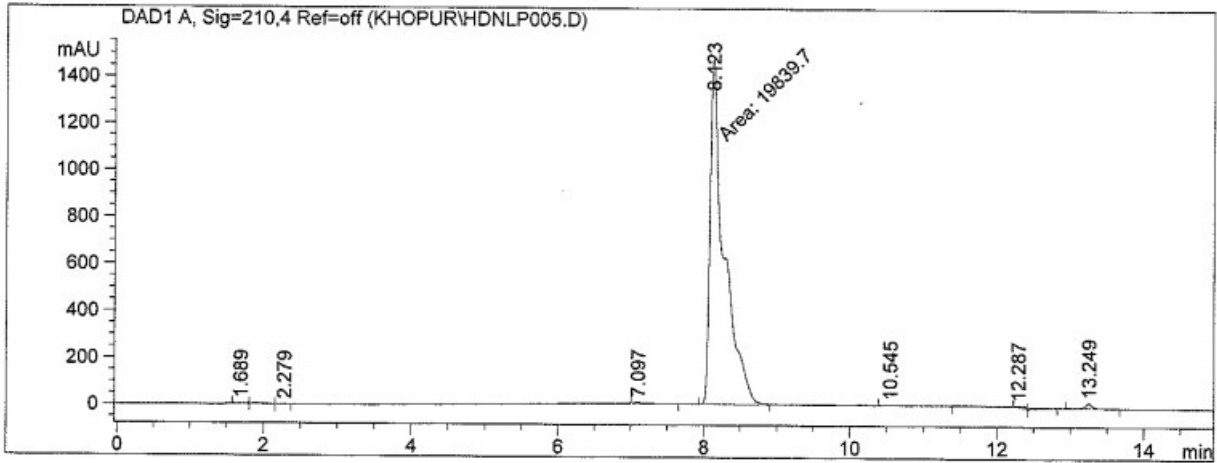

## Area Percent Report

Sorted By : Signal  
 Calib. Data Modified : 2013/05/28 11:12:51 AM  
 Multiplier : 1.0000  
 Dilution : 1.0000  
 Use Multiplier & Dilution Factor with ISTDs

Signal 1: DAD1 A, Sig=210,4 Ref=off

| Peak # | RetTime [min] | Type | Width [min] | Area [mAU*s] | Area %  | Name |
|--------|---------------|------|-------------|--------------|---------|------|
| 1      | 1.689         | BB   | 0.0762      | 9.36703      | 0.0462  | ?    |
| 2      | 1.912         | BB   | 0.2566      | 36.69880     | 0.1811  | ?    |
| 3      | 2.279         | BB   | 0.1384      | 13.41213     | 0.0662  | ?    |
| 4      | 2.887         |      | 0.0000      | 0.00000      | 0.0000  | sulf |
| 5      | 5.220         |      | 0.0000      | 0.00000      | 0.0000  | pir  |
| 6      | 7.097         | BB   | 0.1653      | 49.33882     | 0.2434  | ?    |
| 7      | 8.123         | MM   | 0.2245      | 1.98397e4    | 97.8861 | ?    |
| 8      | 10.545        | BB   | 0.2551      | 20.57146     | 0.1015  | ?    |
| 9      | 12.287        | BB   | 0.1766      | 66.34303     | 0.3273  | ?    |
| 10     | 12.466        | BB   | 0.1462      | 89.51135     | 0.4416  | ?    |
| 11     | 13.249        | BBA  | 0.1010      | 143.20221    | 0.7065  | ?    |

Totals : 2.02681e4

# (E)-2-(3,4-dihydroxybenzylidene)-5-methoxy-2,3-dihydro-1H-inden-1-one (2i)

## NMR spectra

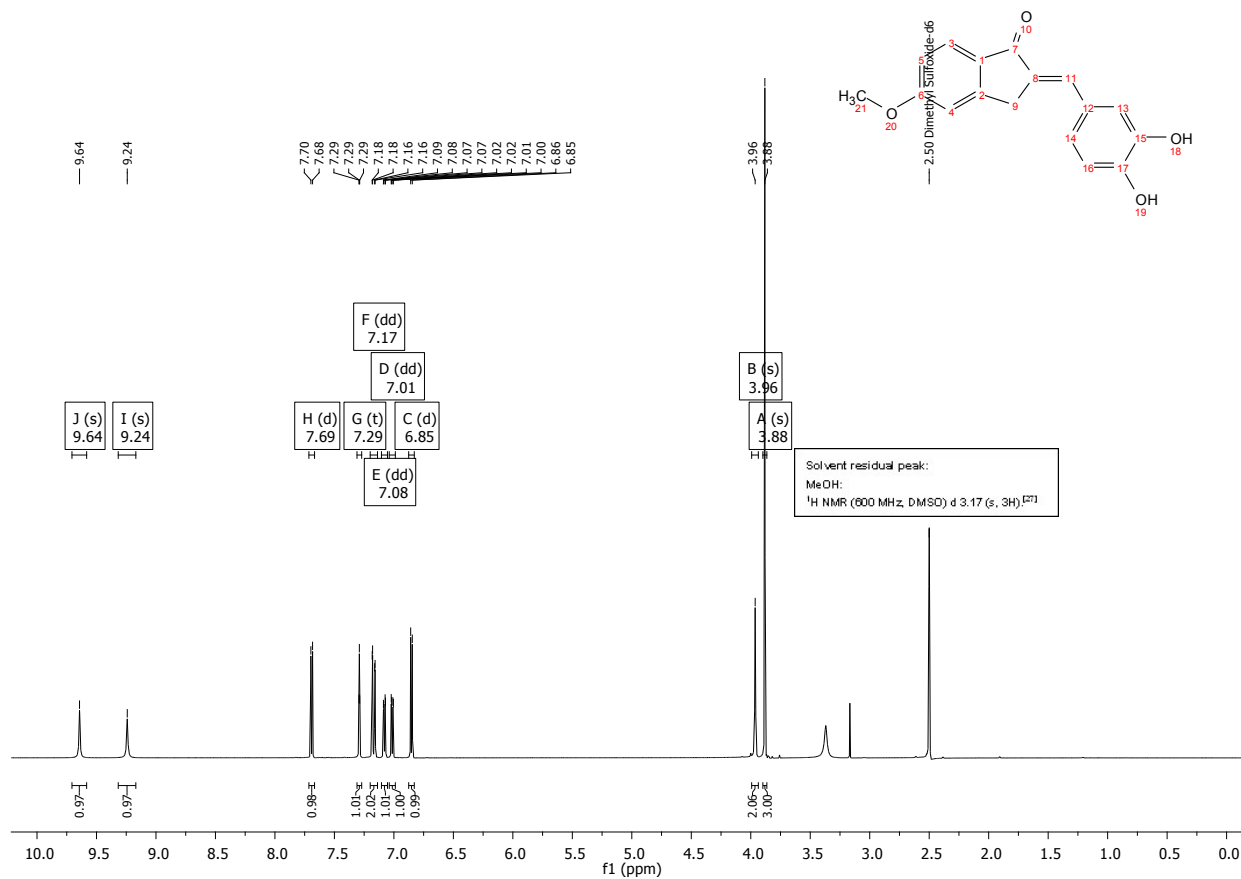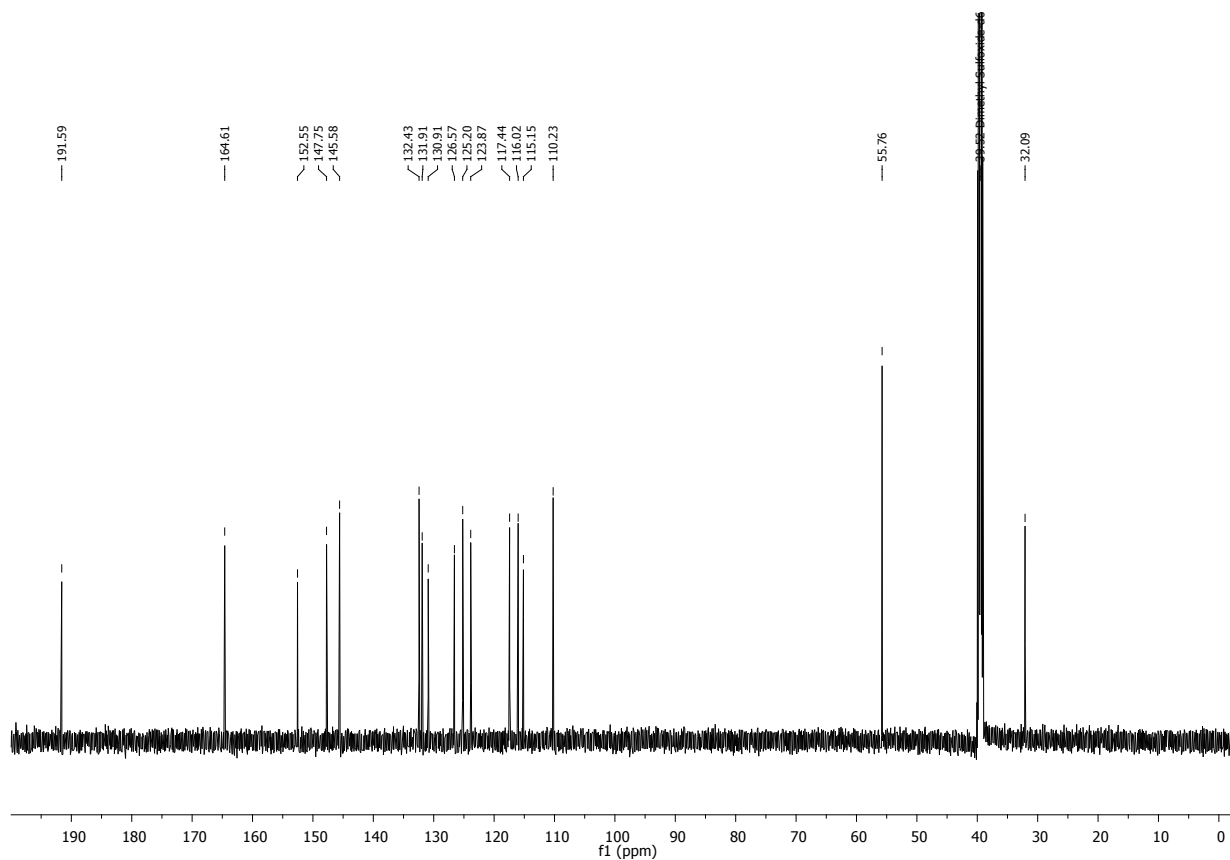

# MS

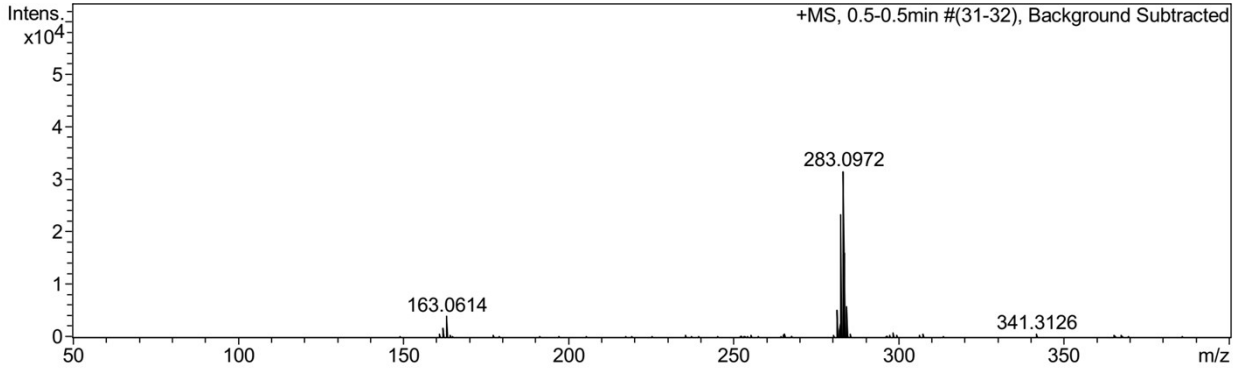

| Meas. m/z | # | Formula                                        | Score  | m/z      | err [mDa] | err [ppm] | mSigma | rdb  | e <sup>-</sup> Conf | N-Rule |
|-----------|---|------------------------------------------------|--------|----------|-----------|-----------|--------|------|---------------------|--------|
| 283.0972  | 1 | C <sub>17</sub> H <sub>15</sub> O <sub>4</sub> | 100.00 | 283.0965 | -0.7      | -2.6      | 3.6    | 10.5 | even                | ok     |

# HPLC chromatogram

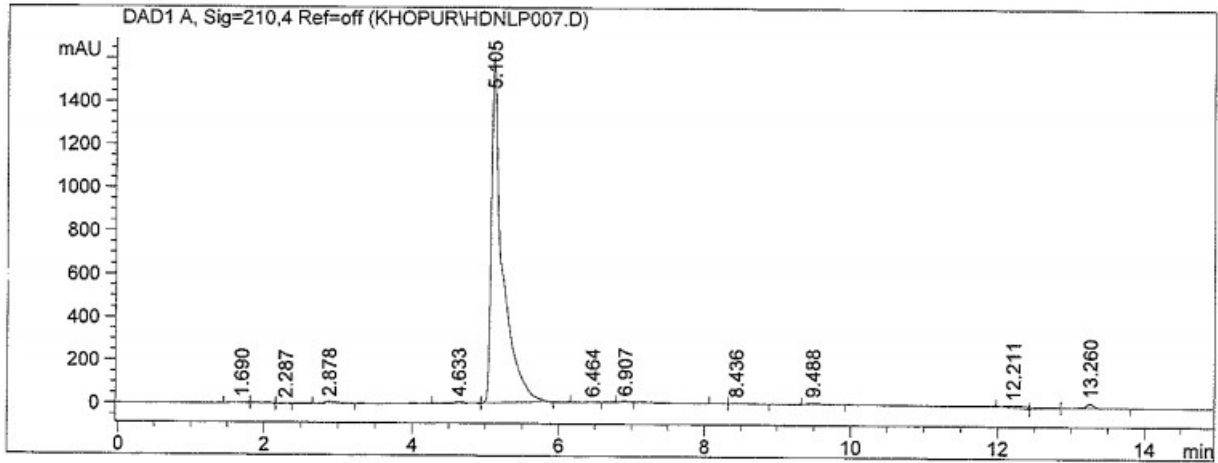

## Area Percent Report

Sorted By : Signal  
 Calib. Data Modified : 2013/05/28 11:12:51 AM  
 Multiplier : 1.0000  
 Dilution : 1.0000  
 Use Multiplier & Dilution Factor with ISTDs

Signal 1: DAD1 A, Sig=210,4 Ref=off

| Peak # | RetTime [min] | Type | Width [min] | Area [mAU*s] | Area %  | Name |
|--------|---------------|------|-------------|--------------|---------|------|
| 1      | 1.690         | BB   | 0.1166      | 19.25243     | 0.1087  | ?    |
| 2      | 1.909         | BB   | 0.2546      | 36.24482     | 0.2047  | ?    |
| 3      | 2.287         | BB   | 0.1624      | 14.25192     | 0.0805  | ?    |
| 4      | 2.878         | BB   | 0.1429      | 79.20682     | 0.4472  | sulf |
| 5      | 4.633         | BB   | 0.1045      | 53.41726     | 0.3016  | ?    |
| 6      | 5.105         | BB   | 0.1448      | 1.68984e4    | 95.4186 | pir  |
| 7      | 6.464         | BB   | 0.1236      | 8.95333      | 0.0506  | ?    |
| 8      | 6.907         | BB   | 0.1145      | 33.89564     | 0.1914  | ?    |
| 9      | 8.201         | BB   | 0.0984      | 7.39410      | 0.0418  | ?    |
| 10     | 8.436         | BB   | 0.1723      | 38.94485     | 0.2199  | ?    |
| 11     | 9.488         | BB   | 0.1761      | 75.80923     | 0.4281  | ?    |
| 12     | 12.211        | BB   | 0.2860      | 187.05733    | 1.0562  | ?    |
| 13     | 12.476        | BB   | 0.1544      | 111.31627    | 0.6286  | ?    |
| 14     | 13.260        | BB   | 0.1086      | 145.60353    | 0.8222  | ?    |

Totals : 1.77098e4



# (E)-2-(3,4-dihydroxybenzylidene)-5,6-dimethoxy-2,3-dihydro-1H-inden-1-one (2k)

## NMR spectra

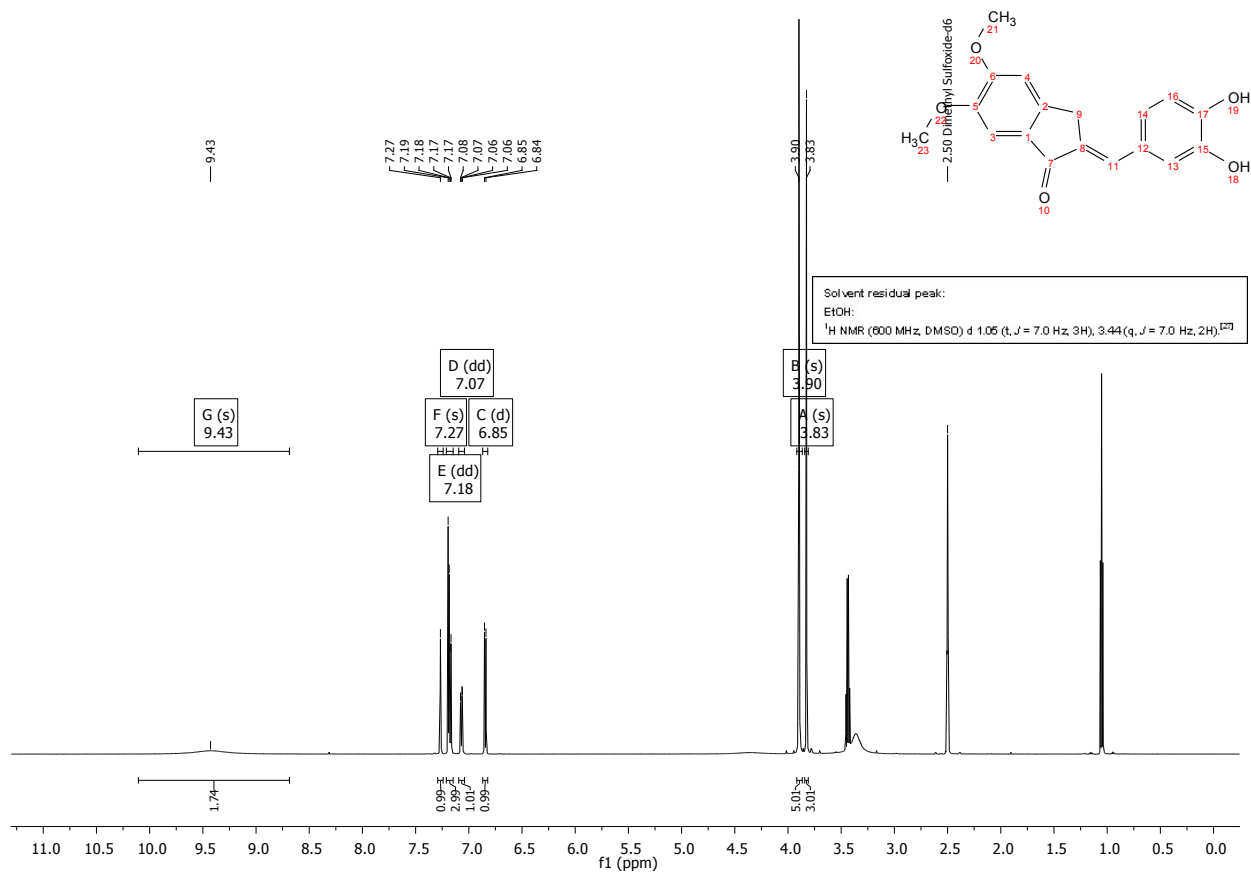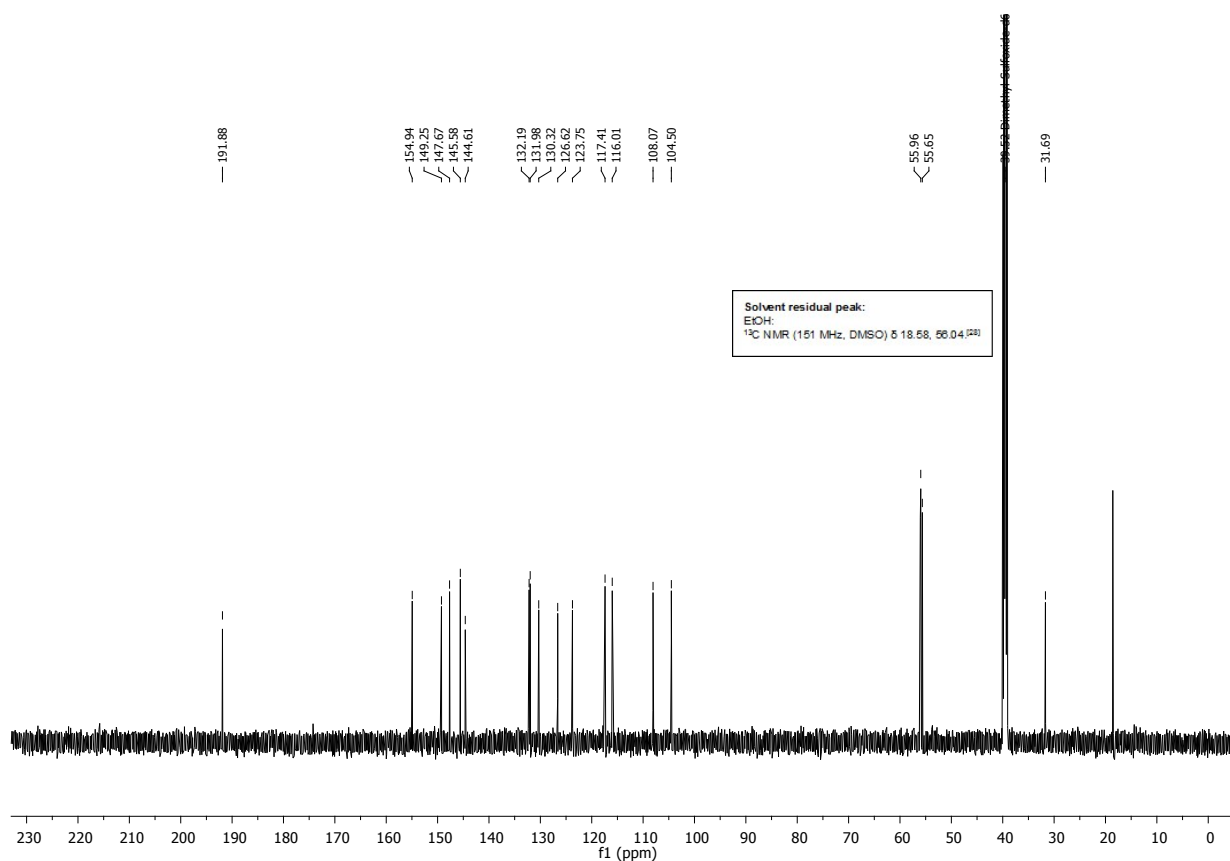

# MS

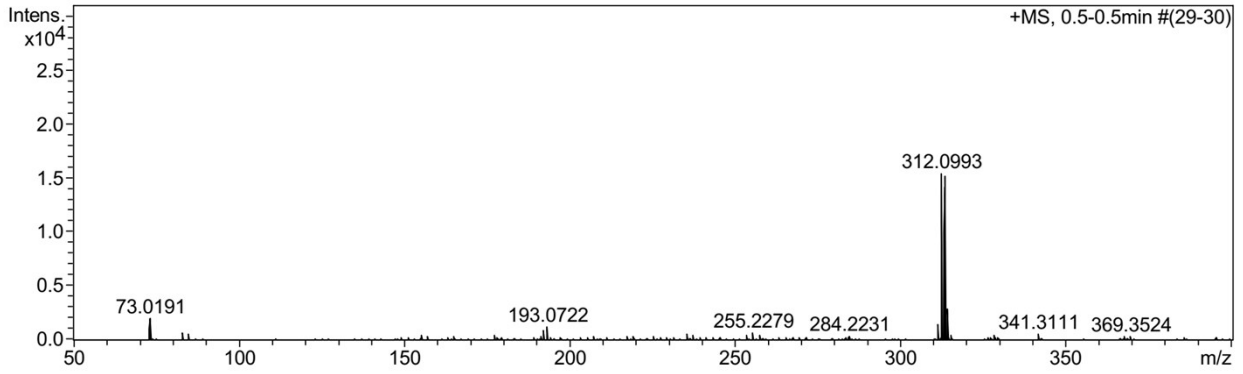

| Meas. m/z | # | Formula       | Score  | m/z      | err [mDa] | err [ppm] | mSigma | rdb  | e <sup>-</sup> Conf | N-Rule |
|-----------|---|---------------|--------|----------|-----------|-----------|--------|------|---------------------|--------|
| 312.0993  | 1 | C 18 H 16 O 5 | 100.00 | 312.0992 | -0.1      | -0.2      | 466.5  | 11.0 | odd                 | ok     |
| 313.1062  | 1 | C 18 H 17 O 5 | 100.00 | 313.1071 | 0.8       | 2.6       | 1.1    | 10.5 | even                | ok     |

# HPLC chromatogram

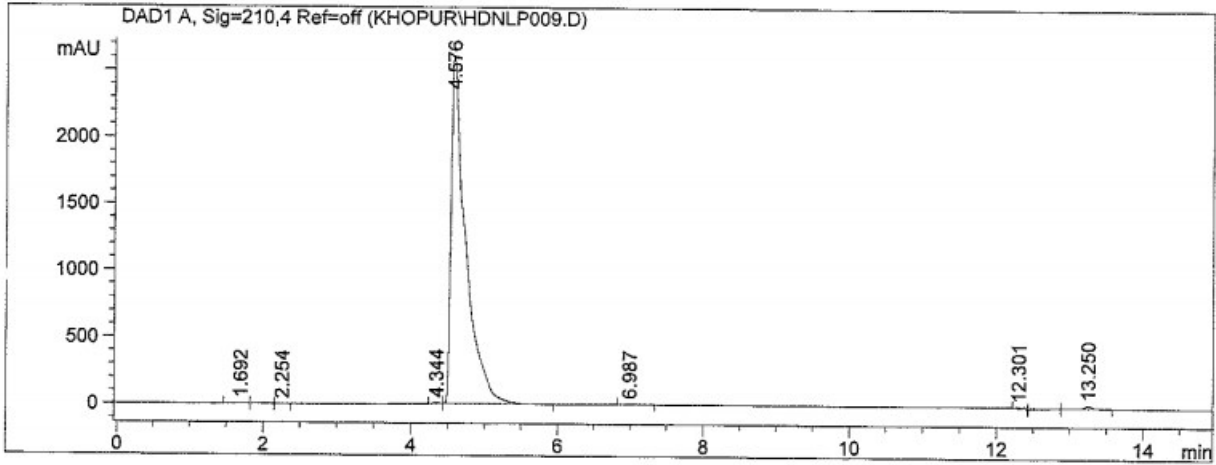

## Area Percent Report

Sorted By : Signal  
 Calib. Data Modified : 2013/05/28 11:12:51 AM  
 Multiplier : 1.0000  
 Dilution : 1.0000  
 Use Multiplier & Dilution Factor with ISTDs

Signal 1: DAD1 A, Sig=210,4 Ref=off

| Peak # | RetTime [min] | Type | Width [min] | Area [mAU*s] | Area %  | Name |
|--------|---------------|------|-------------|--------------|---------|------|
| 1      | 1.692         | BB   | 0.1261      | 21.17537     | 0.0584  | ?    |
| 2      | 1.904         | BB   | 0.2664      | 31.88166     | 0.0879  | ?    |
| 3      | 2.254         | BB   | 0.1301      | 12.89552     | 0.0356  | ?    |
| 4      | 2.887         |      | 0.0000      | 0.00000      | 0.0000  | sulf |
| 5      | 4.344         | BB   | 0.0775      | 38.15683     | 0.1052  | ?    |
| 6      | 4.576         | BB   | 0.1908      | 3.57547e4    | 98.5685 | ?    |
| 7      | 5.220         |      | 0.0000      | 0.00000      | 0.0000  | pir  |
| 8      | 6.987         | BB   | 0.1403      | 41.22489     | 0.1136  | ?    |
| 9      | 12.301        | BB   | 0.1567      | 83.84877     | 0.2312  | ?    |
| 10     | 12.473        | BB   | 0.1642      | 143.97931    | 0.3969  | ?    |
| 11     | 13.250        | BB   | 0.0979      | 146.10318    | 0.4028  | ?    |

Totals : 3.62740e4

# (E)-6-(3,4-dihydroxybenzylidene)-6,7-dihydro-5H-indeno[5,6-d][1,3]dioxol-5-one (2m)

## NMR spectra

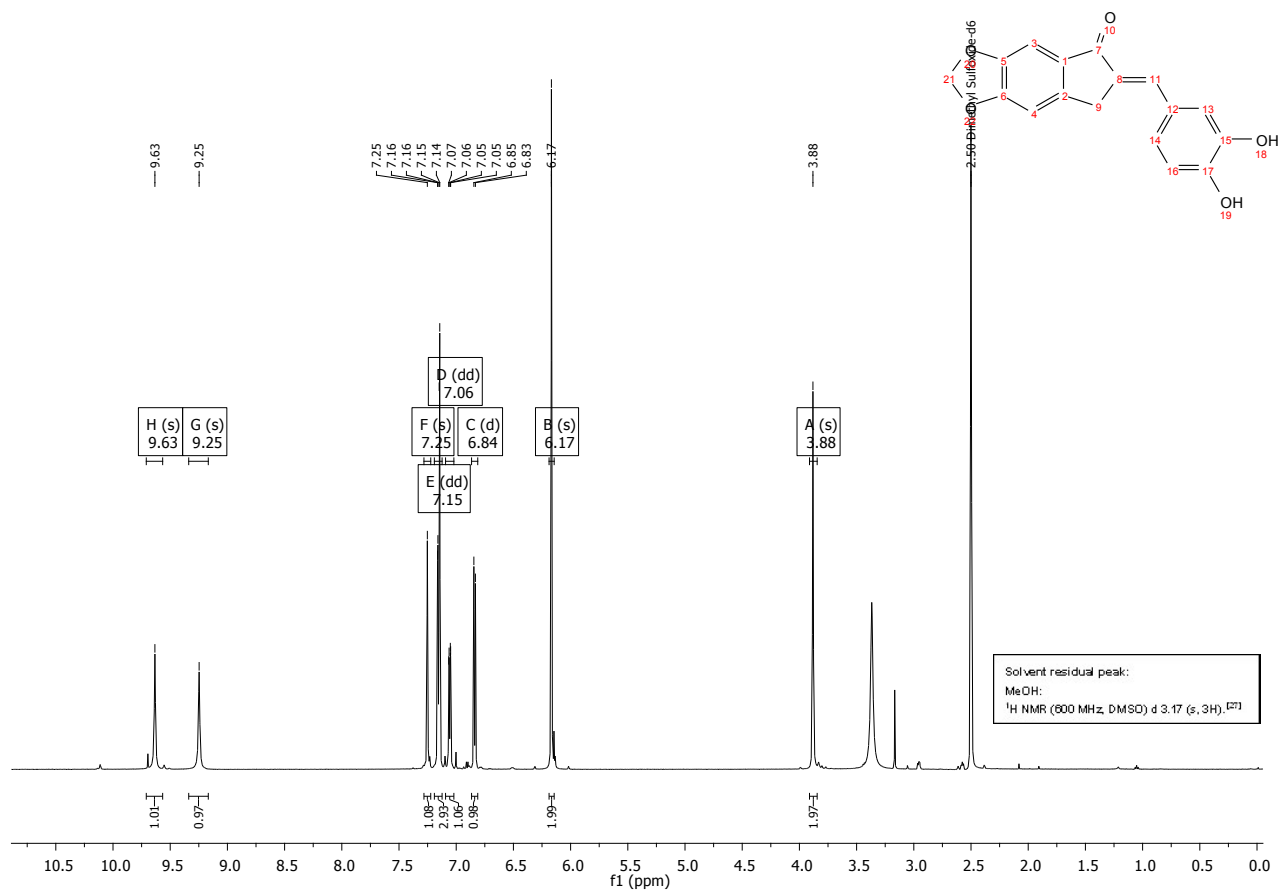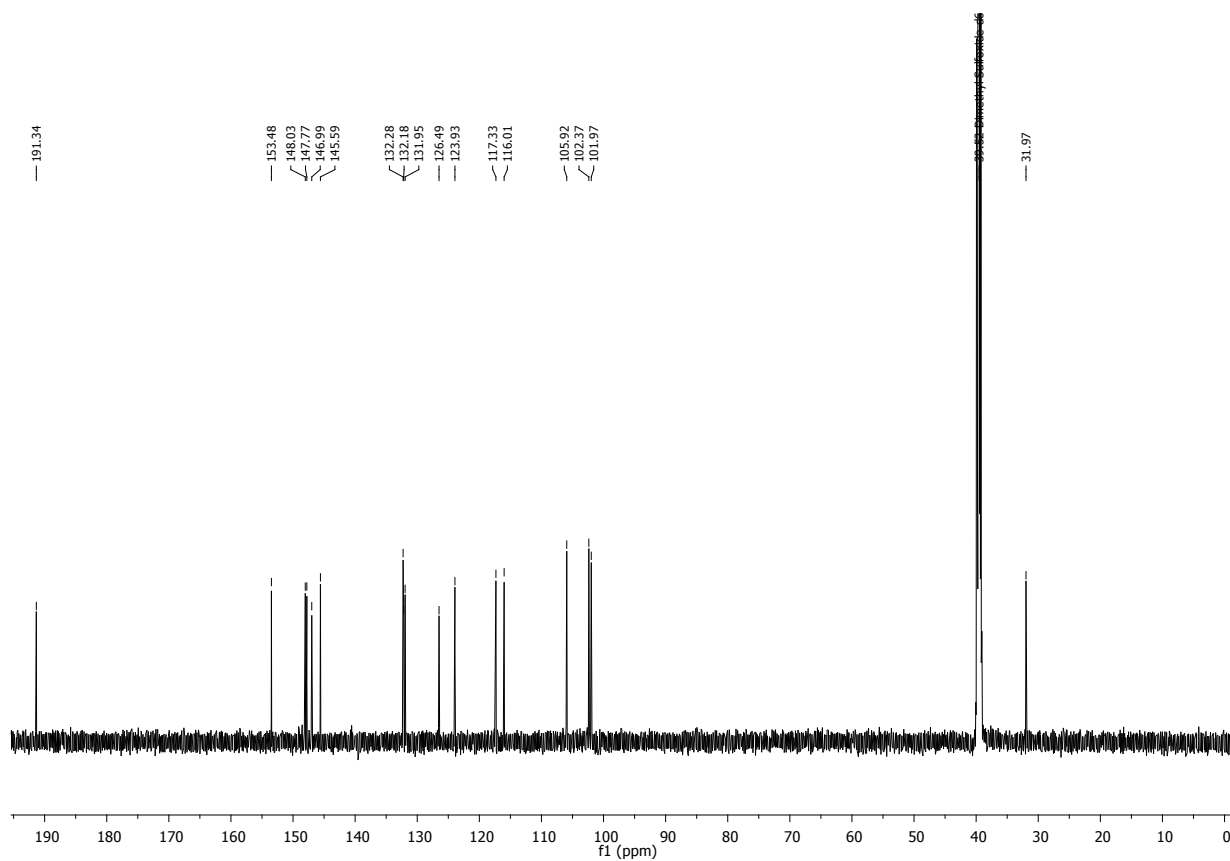

# MS

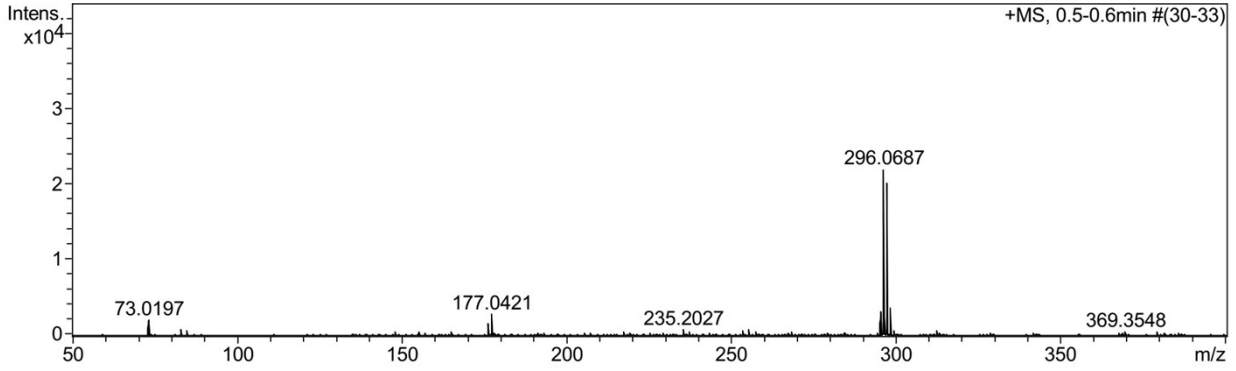

| Meas. m/z | # | Formula                                        | Score  | m/z      | err [mDa] | err [ppm] | mSigma | rdb  | e <sup>-</sup> Conf | N-Rule |
|-----------|---|------------------------------------------------|--------|----------|-----------|-----------|--------|------|---------------------|--------|
| 296.0687  | 1 | C <sub>17</sub> H <sub>12</sub> O <sub>5</sub> | 100.00 | 296.0679 | -0.7      | -2.5      | 430.4  | 12.0 | odd                 | ok     |
| 297.0755  | 1 | C <sub>17</sub> H <sub>13</sub> O <sub>5</sub> | 100.00 | 297.0757 | 0.3       | 0.9       | 1.8    | 11.5 | even                | ok     |

## HPLC chromatogram

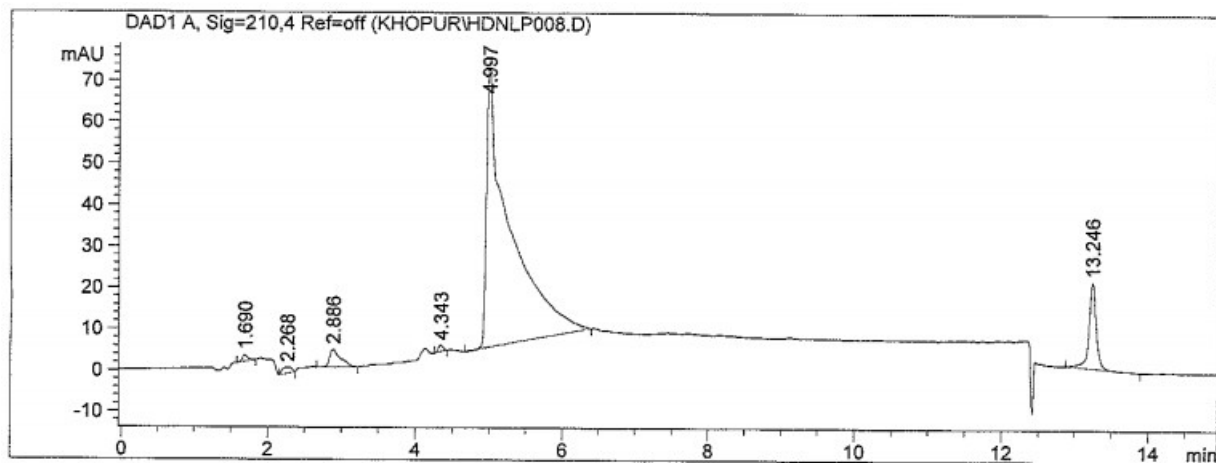

### Area Percent Report

Sorted By : Signal  
Calib. Data Modified : 2013/05/28 11:12:51 AM  
Multiplier : 1.0000  
Dilution : 1.0000  
Use Multiplier & Dilution Factor with ISTDs

Signal 1: DAD1 A, Sig=210,4 Ref=off

| Peak # | RetTime [min] | Type | Width [min] | Area [mAU*s] | Area %  | Name |
|--------|---------------|------|-------------|--------------|---------|------|
| 1      | 1.690         | BB   | 0.0814      | 8.84966      | 0.5128  | ?    |
| 2      | 2.268         | BB   | 0.1558      | 13.83012     | 0.8014  | ?    |
| 3      | 2.886         | BB   | 0.1452      | 45.37901     | 2.6297  | sulf |
| 4      | 4.343         | BB   | 0.0727      | 6.92007      | 0.4010  | ?    |
| 5      | 4.997         | BB   | 0.2767      | 1504.45593   | 87.1811 | ?    |
| 6      | 5.220         |      | 0.0000      | 0.00000      | 0.0000  | pir  |
| 7      | 13.246        | BB   | 0.1060      | 146.23259    | 8.4740  | ?    |

Totals : 1725.66738

## Notes and references

27 H.E. Gottlieb, V. Kotlyar, A. Nudelman, *J. Org. Chem.*, 1997, **62**,7512-7515
